# Supplementary material for: Whole genome sequencing of a novel, dichloromethane-fermenting Peptococcaceae from an enrichment culture
Source: PeerJ. 2019 Oct 2;7:e7775. doi: 10.7717/peerj.7775 (PMC6778437; doi:10.7717/peerj.7775)
Supplement: Supplemental Information 1 [file peerj-07-7775-s001.xlsx]

## Sheet: Table S1
	Table S1. PCR and qPCR primer pairs and amplification conditions used in this study.
	Target	Primers	Sequence (5’ to 3’)	Protocol	Purpose	Reference
	Archaeal 16S rRNA gene	Arc 340F	CCCTAYGGGGYGCASCAG	1) 95˚C, 3:00; 2) 94˚C, 0:45; 3) 52˚C, 0:30; 4) 72˚C, 1:00; 5) go to step 2, 29 times; 6) 72˚C, 10:00	PCR	(Gantner et al., 2011)
		Arc1000R	GGCCATGCACYWCYTCTC
	Bacterial 16S rRNA gene	(GC)338F	(CGCCCGCCGCGCCCCCGCCCCGGCCCGCCGCCCCCGCCC)ACTCCTACGGGAGGCAGC	1) 95˚C, 2:00; 2) 94˚C, 0:30; 3) 61˚C, 0:30; 4) 72˚C, 1:30; 5) go to step 2, 29 times; 6) 72˚C, 10:00	PCR	(Ampe et al., 1999)
		530R	GTATTACCGCGGCTGCTG
	Dehalobacter 16S rRNA gene	Dre445F	GGAAGAACGGCATCTGTG	1) 98˚C, 3:00; 2) 94˚C, 0:20; 3) 58˚C; 0:45; 4) acquisition of SYBR channel; 5) go to Step 2, 43 times	qPCR	(Bunge & Lechner, 2001)
		Dre1248R	GGCTTCCGTTCCGTCTG
	References
	Ampe F, Ben Omar N, Moizan C, Wacher C, Guyot JP. (1999). Polyphasic study of the spatial distribution of microorganisms in Mexican pozol, a fermented maize dough, demonstrates the need for cultivation-independent methods to investigate traditional fermentations. Appl Environ Microbiol 65: 5464–5473. Bunge M, Lechner U. (2001). Anaerobic Transformation of Dioxins by Bacteria from River Sediments:…

## Sheet: Table S2
	Table S2. Assembly parameters tested on the DCMF genome, with relevant statistics.
	Assembly ID	SMRT (N)	Assumed Genome Size (Mb)	Min read length (bp)	Seed Read cutoff	Min RQ	Min Correction Coverage Depth (×)	Contigs (N)	Total Assembly (bp)	Largest contig (bp)	Largest Contig coverage (×)	CircGenome (kb)
	WON710A1.SP16514.hcq	2	5	500	6000	0.8	6	1031	14767807	6442920	56.6	6441
	WON710A1.SP16515.hcq	2	5	4287	8300	0.86	6	971	12147540	3133739	35	3134
	WON710A1.SP16534.hcq	2	7	4539	8614	0.8	6	367	11586443	6451482	47.3	6441
	WON710A1.SP16535.hcq	2	7	2368	8065	0.84	6	219	10403067	6451597	48.6	6441
	WON710A1.SP16540.hcq	3	7	500	6000	0.8	6	1164	20360297	4849716	122.9	4850
	WON710A1.SP16543.hcq	3	7	4010	8003	0.86	6	1307	16089549	6450325	49.2	6446
	WON710A1.SP16547.hcq	3	7	4010	8003	0.86	7	207	9836800	6449981	49.3	6441
	WON710A1.SP16546.hcq	3	7	4010	8003	0.86	8	213	9307776	6449974	49.3	6441
	WON710A1.SP16548.hcq	3	7	4010	8003	0.86	9	233	9010440	6449952	49.3	6441
	WON710A1.SP16550.hcq	3	7	4010	8003	0.86	10	276	8801861	6449940	49.3	6441
	WON710A1.SP16551.hcq	3	7	4010	8003	0.86	11	380	8773381	1893414	48.9	1893

## Sheet: Table S3
	Table S3. Manually curated protein sequences. These genes were either fragmented or cut short in the original JGI annotation, due to the presence of a pyrrolysine or selenocysteine residue. All annotations have been publically updated on JGI.
	JGI Gene Locus	Product Name	DNA Coordinates	Replacing Genes	GenBank Accessions	Amino acid sequence
	Ga0180325_111271p72	dimethylamine:corrinoid methyltransferase	1309129..1310520	Ga0180325_111271 Ga0180325_111272	ATW24429.1 ATW24430.1	MGKFFSRMGDGAAVWLSEADIRADIEAGTLDAADRAKVPPLTGDEQKYLFELCTMPQQMVCVDRGKEIVTTGDSGATKLPYDGSIPMDRSTAVLVHERAFCVDTMEMGNIDYSYKQVKAILHEEKSALETAQMHTVVPLLYGAMPNLGLYTKPDGPVDNWSELLPAGKIAEARAAQEEAVEHAVKDLVYCADGLYEAGADGINFDTVGASGDADVLATLNAVRILKEKHPDLPINLGMAGEFILGMHGQLYFDGVRLAGLYPHKQVKIAEQAGATIFGAVVNTNSSQSFPWNVARVCTLVKACTEAAHIPVHVNVGMGVGSVPLTLTPPVDAVSRADKAIIEIGKADGLOVGVGDPFGMEITHEMAAGMGGIRTAGDLVARVQLSKAMKIDAAKQYVAE…
	Ga0180325_111278p79	trimethylamine---corrinoid protein Co-methyltransferase	1315739..1317211	Ga0180325_111278 Ga0180325_111279	ATW28398.1 ATW24435.1	MRRNLLSGRNLWQGFGLQVFTDSELEMIHLATLEVLERTGIFVQSQEALSIFEKNGALVDRENRNVKIPAYLVDEAIRSAPQKIVLAGRDPQNDLVLESGRVNFCPFGEGIHVIDPYTGEHRKSTKKDIGDVALLVDALDQYDMLEYTVSPRDVHPKVAVYHTYEATVSNTTKHIPQSPEDKESAQVLIEMAAAVAGGKEKLRDRPIVSGAACPQSPLSLSEGCCEGIMEYARARLPMNVLSMAMAGGSSPVSLAGTLVTHNAEVLGGLVLAQLTAKGAPVIYGSSTTILDLRLASATVGCPELAMISAAVAKMAQFYQLPSYVAGGOGDSKVSDLQAGHEKTLTALLPALAGANMIYGLGMLEMGMTLSYGQIVADNEFAAMIRRVLEGIPVHDEDLA…
	Ga0180325_111485p86	trimethylamine---corrinoid protein Co-methyltransferase	1519657..1521168	Ga0180325_111485 Ga0180325_111486	ATW28426.1 ATW24608.1	LTVRGIHAGSFRKEGLGLNLFTEDDLYDIHLATLDVLWNVGVKVESEEAVEYFDGGGCQVDKKTHIVKIPAWLIEDALRSIPKTFRACGRNPENDWLNEGNRTGFVNFGEAVTMIDPYSYELRKPKKKDVDDVTRFCEAMDSVIVFERALGPSEVDPDVAQVHIAESFFNNCTKHAYIGMNRPENMRAVAKMAYLVCGGEDKFRERPIFSQSTDPVSPLVHSKSSTDTLIQAIRCGVPAKINPMGLAGGTTCVHLAGTLVTHNAEVLSMFVLAQLVKKGHPMVYGSSTAMMDLRTTLACVGSPELALFSAAVAKIAQFYLIPSWVAGGOTDSKVPDAQAAHEFTLTALLPALAGANMIYGLGMLEGGLTWDYAQLVMQNEMVKMILHCVKGIPVNDEKM…
	Ga0180325_111620p21	trimethylamine---corrinoid protein Co-methyltransferase	1664433..1665911	Ga0180325_111620 Ga0180325_111621	ATW24711.1 ATW24712.1	VKRNTNAGYASFSGASLQLFSEGDLHFIHLATLEVLERTGLNITDEEALEYFERGGAIVDHQKKVVKIPGYMVEEAIKSAPASVFLAGKDPKYDIILEEGRVYFCPFGLGIEIVDPYTGVLRETTKQDIADCARIVDYLDEYDFCFDTMVARDVDPHVACIHGFEAPLTNTSKNVLASPENKQTAQILLEMGAAAAGGMDNLKERPIMMLGGCTISPLTIPESTVAATIEAAKARIPAMILSMAMSGGMGPVTLAGALVVMNAEILGALTLSQLVNRGTPFIYGSSTGTLDMRHNAAAMVGCPELGLISAGVAALCRMYNVPSLVAGGOTDSKVPDMQAGHEKTLTAILPILAGANMIYGPGMLDSGIIMSLGQVVADADFIRMFKTVLAGVPVNEETL…
	Ga0180325_111622p23	trimethylamine---corrinoid protein Co-methyltransferase	1665978..1667447	Ga0180325_111622 Ga0180325_111623	ATW28451.1 ATW24713.1	MKRNTAAGYNTWVGCGVQLFSDNDLEAIHSNTLEVMGKTGINVQSPKAMDIFEQGGAKVDREKQNVKIPAYMVEEAVRTAPGKVLMAGRDPKNDVILEYGRVNFIPFGTGVMVVDENGEYRKSTKKDICQLATITDALDQMDFCFDTVIPRDVDQRTVCYHSFEGHINNTTKHVFTSPEDTHSAQVLIEMAGKVIGGKEKLKDRPIITGGGCPISPLSWSEGLCESMIEYAKAELPFLLVSMAMAGGTSPVTLAGTLVTQNAELLTGVVLSQLVQKGAPVIYGSSTTNLDLRKAMATVGSPELSLISSAVAKLAQFYNLPSFVAGGOADSKDSDLQAGHEKTLTYMLPMLAGANIIYGSGMLEMGMTFGYAQYVADNEMVRMLRRLLQGIPVNDESMAV…
	Ga0180325_112547p48	monomethylamine:corrinoid methyltransferase	2702096..2703484	Ga0180325_112547 Ga0180325_112548	ATW25483.1 ATW28569.1	MALPKKVTVFDIYDRAKTGPKLEEKEWDTKVIPQTAAKLKQKYGIKMDKQVIVPTDQELIRHLFQAGLEMLVECGVYCMDTGRIIKYTEEEVLASLDAAPSKVMIGEGKDAVELACRSYHOGNETSLSAAGDPRPPIIQGGPTGAPCSEEHFLGIHQSYAQEPLVGTIVDGVLQTINGHDPVPGSPWEIAAVKSEAILVRAAQLRAGRSGMGLOGNETSLSAAGVIAADFPGGMRPSDSHEVSQLNELKIDVGALAFTAHYVLAGNIIMCEQMPIYGGYAGGLEETTIVDVATTINSFVMTQATWHLDGPVHVRWGITTAREALAVAGHCAMAIEANTHLMLGNQYYTMAGPCTVMCLLETAAQAITDTASGREIVSGVAAAKGVATNYTTGMEARMMA…
	Ga0180325_112878s80	formate dehydrogenase	3045568..3048246	Ga0180325_112878 Ga0180325_112880	ATW28615.1 ATW25737.1	VDAVKLTIDGREVEVPAGTTILEAAEQIGIDIPRLCFDPELSLQGSCRLCVVEVEGAPLLSASCVTPVGRGMVVHTESPLVVETRRTILELLLANHPLDCLTCEKNGDCRLAEYCYRYGVKDSSFAGERHHYPIDDSNPFVLRDMNKCIQCGKCVRACAEIIGKDNIDYINRGFDRKVATYGDKPYVDSVCTFCGNCVAVCPTGALTEKPMQGKGRRWELDRVRTTCPFCGVGCNFDLCVKDGKLVGVLSNPDSPANGRALCVKGRFGWDFVNNEQRLTTPLIKREGKFEPASWEEAIDLISTRFTEIREKYGPKSFAALSSARCTNEENFLMQKFTRAVMGTNNVDHCARTUHAPTVAGLATTFGSGAMTNSIAEISGAELLMLVGTNTTEAHPVIGY…
	Ga0180325_113356p57	dimethylamine:corrinoid methyltransferase	3570932..3572323	Ga0180325_113356 Ga0180325_113357	N/A ATW26132.1	MKKYFTRMGDGSAVWMSDEDIRWDLEEGMKDAADRGKIPELTDDEIEQLFEIITHPQKTVSCERGNEAVVTFDAGTLKLPVRAGLPMDRTTTILTHERVFCSDTMELCATDYSYKALKNIVSEEAMAMERAQLNCIIPIFYGAMPNLGLYTKPDGPIDNWSELLPLAKIPEARAAQEEAVEHAVRDMVFIASALYESGADGINFDTIGASGDGDYLAALKAAEILKDKYPGIPIEMGMAGEFVLGMHGQLKYDGVRLAGLYPHQQVKVCEKAGATIFGCVINTNSSMSFAWNLARTVTFAKACVEAADIPVHVNAGMGVGGIPLTNTSPTDATSRASKAIIEIAKADGLOIGHGDAYGMAVTHEVATGMGGIRTAGDLVARMQMLKGMKLKDAKEYVAG…
	Ga0180325_113361p62	trimethylamine---corrinoid protein Co-methyltransferase	3576747..3578225	Ga0180325_113361 Ga0180325_113362	ATW28666.1 ATW28667.1	VARNLHAGFNRMDGFALNTFSQDELYAIHCATLDVLHHVGVRVDSPEARDLFDGGGAFVDPKTNIVKIPPYLVEDAIRSTPGTLILAGRDPNKDYCMEANRVGFVNFGEGVNVIDPVTRKYRTTTKADVANAARMSDYLSEMDISYRAVVAQDQPGHVQSLHNAEAIFPNTTKHFFIGADGVKNARKLIKMAQAVAGGKDQLRERPLITFNVCPTSLLKLIPECTDVVIEAARAGIAINIISMAMAGATSPVTLAGTLVTHNAEVLSTIVLNQLACKGAPCIYGSSTTIMDMRYTTAPVGAPELGMISASVAKMAQYYLLPSFVAGGOADSKIPDAQAAHEKTLTALLAAQGGANLIYGAGMLELGITFDFAQFVMDNEMYKMIRKAVGGISVTDANMA…
	Ga0180325_114321p22	dimethylamine:corrinoid methyltransferase	4654504..4655895	Ga0180325_114321 Ga0180325_114322	ATW28793.1 N/A	LSKFFTRMGDGSGIYLSADDIRWDLEEGTKDAADRGKIPELTKEELDHLYDIITMPGIVVGVERGNEVVTTSDSGGCKITYHANIAIDRGTAVLIHEKVLGADSLDIGHIDYSYKAVKSVLHDEAAVMELTQLNAVMPVLYGSMPNLGLYTKPDGPVDNWSELLPLGKIAEARAAQEEAVEHAVKDIVYVAGGMYESGADGMNIDTCGASGDADVLAALKAIELIKQKYPDLGIEMGMAGEFVIGMHGKLEYDGVRLAGLYPHKQVKLAEKAGANIFGCVVNTNSNMSLAWNLARTVTFVKACTEAATIPVHVNVGMGVGAVPMSEMPSVDAVSRVDKALVEIGKADGLOIGVGDPFGLEIAHEVACGMGGIRTAGDLVLRMQLSKGMKINDAKKYVAE…
	Ga0180325_114324p25	trimethylamine---corrinoid protein Co-methyltransferase	4656612..4658090	Ga0180325_114324 Ga0180325_114325	ATW28795.1 ATW28794.1	LSRRNLYAGNSMQEGFGLNVFSQDALDRIHNATLEILWYEGIKIQSEEALEIFHGGGCVVDKKNQKVYIPPHVVEDCIRSTPSTVLLAGRDPKNDIVLDGSRVNFCNFSKGVNVVDPYTGAVRPSTKQDEANVAILVDALEQYDLLDVAVEARDIDARTANLECYEAMVSNSTKHSTQSPHSFEEAQTLIDMAAAVAGGKDKLRERPITSSTVCPTSPLSIAPETCEPIITYARNRVPLTVLSMAMAGGTSPVTLAGTLVTHNAEVLSGIVLAQLTNKGTPNMYGSSTTIMDLRLASAAIGCPELGMISAAVCKLAQYYNIPSYVAGTOTDSKIGDEQAGHEKTLTMMLAALAGANMIYGLGMVDLGMTLDFGQLVVDNEIAKMVRRTLMGIPVNEETL…
	Ga0180325_114454s56	glycine/betaine/sarcosine/D-proline reductase complex selenoprotein B	4793312..4794625	Ga0180325_114454 Ga0180325_114455	ATW28805.1 N/A	VSKIKVVHYLNQFFGQMGGEEKADIPPQLREGAVGPGMALNGAMGEGGEIVATVICGDSFFNENMDAAGGDVVAMIKKYHPDVVIAGPAFNAGRYGVACGAVAKAVSEKLQVPVVSGMYPENPGVDLYRRYAFIVETGNTAAGMRKAIPSMAKLALKLGQGSPVGSPLEEGYIPRGLRVNFFAAERGAKRAVDMLVKKIKGENFETEYPMPVFDRVAPGPPVKDLAKATIALVTSGGIVPKGNPDRIEASSASKYGKYSLAGVRDLTAEAYETAHGGYDPVYANEDADRVLPVDVLRELEDQSVIGKLHEYWYATVGNGTSVANSKKYAAAIAQDLQAAGVDAVILTSTUGTCTRCGATMVKEIESTGVPVVHMCTVAPISLTVGANRIVPTVAIPYPL…
	Ga0180325_114673s74	glycine/betaine/sarcosine reductase complex selenoprotein A	5000370..5000816	Ga0180325_114673 Ga0180325_114674	ATW27204.1 ATW27205.1	MLSGKKVAVLGDQNGISGQAIEACVKAAGGEVVFSSTECFLUITGGAMDLRNQARVKESAEKYGNRDLIVILGGAEADVCGIAVETVSTGDPSYAGPLSEIPLGLKAYHIFELKDEIPPEVYEEHIGFMETVFPVEDIIKECRAYRSP*
	Ga0180325_114675s76	glycine/betaine/sarcosine/D-proline reductase complex selenoprotein B	5000876..5002186	Ga0180325_114675 Ga0180325_114676	ATW27206.1 ATW27207.1	MARYQNPVRIVHYLNQFFGGMGGEEMADLKPQVKNEPIGPSKKIQELLGTDYKIVATIMAGDNYFVEHKDLALQKVMAFVKKMNPDIFIAGPCLCMGRYGLACAWICSRVSRELGIPTVLSMSPHNPAFSILPPDIYFVPAGETIRDMKNDVRQFSKMIDKLRQGQRGIIDTDGAFLTGKRGNTLVSANGATRAVQMLVRILHDEEAGSEIPIAKNNGIRSAPPIADLSTARIALVTEGGIVPLGNPNRLRSARETRWFRYDLPLVEGEMARFQCIHGGFDTNYATIDFNRILPVDTLIGMEKSGGIGRLVPWYFVTCGNLVSVKDSKQMGSEIVRFLIQDQVDGVFLTSTUGTGTRCGATMAKVFESAGIPTVVLTPLVDLAMQFGAYRIVRGLTVTS…
	Ga0180325_114680s81	glycine/betaine/sarcosine reductase complex selenoprotein A	5005448..5005891	Ga0180325_114680 Ga0180325_114681	ATW27211.1 ATW27212.1	MLQGKKVAILGDRDGIPGPAIEECVKSAGAEVVFSTTECFVUTAAGAMDLENQARIKDLTEKYGNEDLIVVLGGAEAEASGLAAETVSTGDPTFAGPLSGVSLGLKAYHMFELKEEVDPKVYDEQISMMEMVLDVDEIINEVKTYRG*
	Ga0180325_114685s86	glycine/betaine/sarcosine/D-proline reductase complex selenoprotein B	5009981..5011291	Ga0180325_114685 Ga0180325_114686	N/A N/A	VENFRVVHYLNQFFAGIGGEDQADMSPAIREGCVGPGLSLDRLWQGQGKIVATVICGDNYFSTNPEATVQELLPLIEAHHPDVVIAGPAFASGRYGLSCGYLCRAVVSKLRIPCVTSMEPENPGVQEAKGLAYIISASDRVARMGRVLPKVARLAAKLACGQSPGAAQEEGYLPRGYRLNTLRTESGAVRAVNMLLAKMNKHSFMTEIPLPQYDQVTAAAPLETGGKIRLALVTESGLVPEGNPDHLESSRATKWLKYPIPGEKYVANKHYSLHGGYDVRFVNADPNRVVPLDAVATLVREGVIGEVCQHYYVTTGMAAPIARATKFGSEIAHDLLQEGVNMVIVTSTUGTGTRCGATLAKEIEREGIPAVIITALPDVARNIGTPRIVQGVAITNPTG…
	Ga0180325_114726p27	dimethylamine:corrinoid methyltransferase	5062099..5063493	Ga0180325_114726 Ga0180325_114727	ATW27250.1 ATW27251.1	LDKFFTRMGDGSAVWMSEEDIRWDLEEGMKDAADRGKIPELTDDEMQQLFEIVTHPLKNVSCARGNEAVVTFDAGTLKLPVRAGLPMDRMTTILTHERALCSDTMELCTTDYSYKSIKNFVHEEAMSMELAQLNSIIPLFYGAMPNLGQYTKPDGPIDNWSELLPMAKIAEARAAQEEAIEHAVRDMVFIASALYEEGGADGINFDTVGASGDGDVLATLKAAQILKGKYPEIPIEIGMSGEFVLGMHGQLAFDGTRLAGLYPHQQVKVCEKAGATIFGCVINTNSSMSFAWNLARTVTFTKACVEAASIPVHVNAGMGVGGVPLTNTSPTDATSRASKAIIEIGKADGLOIGHGDAYGMAVMHEVTTGMGGIRTAGDLVARMQMLKGMKLKDAKEYVA…
	Ga0180325_114729p30	trimethylamine---corrinoid protein Co-methyltransferase	5064364..5065839	Ga0180325_114729 Ga0180325_114730	ATW27253.1 ATW28835.1	VSRNLHAGFHRIDGFGINVFSRDELYAVHCATLDVLQHVGVRVDSKEAQEIFAGGGATVDPQTDIVKIPPYMVEDALRWAPGTLLLAARDPKKDYILESNRVGFVNFGEGVNIIDPVTRKYRPTNKRDVANAALMSDYLSEMDISYRAVVAQDQPGHVQSLHNAEAIFPNTAKHFFIGADGVKNARKLIKMGAALAGGKDKLKERPLISFNVCPTSLLKLIPECTDVVMEAARAGIPVNIISMAMAGATSPVTLAGTLVTHNAEVLATIVLSQFTCKGAPCIYGSSTTIMDMRYTTAPVGAPELGMISAAVAKMAQYYLLPSFVAGGOADSKVPDAQAAHEKTLTGLLAAQGGANLIYGAGMLELGITFDFAQFVMDNEIFKMIRKAVGGIRVTDADMA…
	Ga0180325_114797s98	glycine/betaine/sarcosine reductase complex selenoprotein A	5139489..5139932	Ga0180325_114797 Ga0180325_114798	ATW27301.1 ATW27302.1	MLEGKKVAILGDRDGIPGPAIEECVKSAGAEVVFSTTECFVUTAAGAMDLENQARIKDLTDKYGNEDLIVVLGGAEAEASGLAAETVSTGDPTFAGPLSGVSLGLKAYHMFELKDEVDPTVYDEQISMMEMVLDVDDIINEVKTYRG*
	Ga0180325_114803s	sarcosine reductase complex selenoprotein B	5144611..5145921	Ga0180325_114803	ATW27306.1	MSDKFKVLYYVNQFFGQVGGEDKAGMAPEFRPEKVGPALGFEGLLNKEGEVVGTIICGDNFFNENKEDALNIILNTVKEAAPDVFVAGPAFNAGRYGVACAEISKAVAERLNIPVVTGMYVENPGLDICKEIAYVVSTSDSAGGMRKALPAMAAITSKLAKGIEVGSPEEEGYIARGMRKTLFAEKRGSQRAVEMLLARLKGQPFQTEMPMPVFDVVPPAPAIKDLRKATIALCTSGGIVPEGNPDHIQSASAQKWGKYQVGSRDALNAPDFYTTHGGYDPVYANEIPDRVAPLDILKEFEKEGYIGKVYDWFCTTTGTGTAVSKAREFGTEIGAQLKEAGVDGVILTSTUGTCTRCGATMVKEIERYGIPIVHMATITTISESVGANRIVPTVAIPHP…
	Ga0180325_114855s	glycine/betaine/sarcosine/D-proline reductase complex selenoprotein B; pseudogene	5196481..5197803	Ga0180325_114855	ATW27352.1	LPKVRIVYYINQFFGGIGGEEHAGHLFEVKNGPVGPGALLEKLLGNECGIEKTIVCGDNEFNEHEGENIKKILEVIKQVNPDIFVAGPAFTSGRYGLACMKACVAVAENFGIPCVTGIHPENPGAGLQEKQQHVYAVPVGKSAATMKSAIQLFSDLISKIVLNGENGLSVGDGFLSRGIRKNVKVADGAPKRACEMLLNKIKSLPFQSEIAAEQYEVIVPPQPIKDLSKAKIALVTEAALVPEGNPDGIQAARADKWAKYSIKKTDDFVEGSFHSVHGGYDSKWVDKDPDRVLPLDALRYYAQNSEVGQVCEYIYVTCGSMGHVLTMEKIGKEIADQLLKEQVDGVILTATUGTGTRSGATVAKQIEKAGIPAVTCTGLPDVALRVGANRVYRTEGHFH…
	Ga0180325_114860s61	glycine/betaine/sarcosine reductase complex selenoprotein A	5202556..5202999	Ga0180325_114860 Ga0180325_114861	ATW27357.1 ATW27358.1	MLQGKKVAILGDRDGIPGPAIEECVKSAGAEVVFSTTECFVUTAAGAMDLENQARIKDLTEKYGNEDLIVVLGGAEAEASGLAAETVSTGDPTFAGPLSGVSLGLKAYHMFELKEEVDPKVYDEQISMMEMVLEVDEIINEVKTYRG*
	Ga0180325_114888p89	trimethylamine---corrinoid protein Co-methyltransferase	5232064..5233548	Ga0180325_114888 Ga0180325_114889	ATW27380.1 ATW28860.1	MRTNSEAAVNLTRGFGLKMFSEDELYAIHLATLQVLERTGIKVESEEALEIFDAGGAKVNKQTHLVKFPAYIVEDAIRSAPSKVVLNARNPVHNVILEGKRVHFTNFGEGIMVIDPFTGAYRKSTKQDCANAALICDALDEVDVILRAVAAHDVFVPTHALHEMEVCFHNTSKPVFNGGVNARLAEYLFQMGAAVCGGMDKFKERPILSLNVCPTSPLQLTSHCTDAIIKCAEYGVPVNILSMAMAGGSSPVTLGGTLVTHNAEVLSGVILNQLTRKGAPVIYGSSTTMMDLKTTTAPVGAPELGMINAAVAALAQYYLLPSWVAGGOVDSKIADAQAAHETTMSTLLTGLAGANLIYGVGMLELGITFSFEQMVMDNDIIKMVRKVLKGIEISDETLA…
	Ga0180325_114961p62	trimethylamine---corrinoid protein Co-methyltransferase	5318237..5319715	Ga0180325_114961 Ga0180325_114962	ATW28871.1 ATW28870.1	VKRNFQVGISHISGFSLNALTADELYAVHCAILEVLQDSGLKVDSREAQAIFEGGGCKVNPKTNIVKIPADVVEDAICSAPSTFLLAGRNPKNDLVVGGKSSAFFNFGEAIYLYDPFTLAYRKSTKEDVGNAALICDAMEEMEICNRGMGADEYPGPIQSIHNADAIFSHTSKHCFIGPNSGYNYKKVVEMAAAIQGGMEALQERPIYSATVCPTSPLQLLPEMSDVVIEAARYGLPVNIVSMAMAGASSPVTLAGTLVTQGAEVLGGIVLNQLTRKGSPVTFGAVSTIMDMRLATAPVGAPELGMLSAAMANLAQYYKIPSFGAGGOSDSKVPDAQAAQEKALSLLTSSMMGVNLVLGIGMLEGGLTYDFAQIVMDCELIRMVRRIVRGITVDDESLA…
	Ga0180325_115204p05	trimethylamine---corrinoid protein Co-methyltransferase	5606151..5607593	Ga0180325_115204 Ga0180325_115205	ATW27642.1 ATW28898.1	MYQEEVLGYSILREQDLAAIHQGTLDVLAETGLKVFSEKAREIYSGAGCIVDDQNMIVKISPHIVNDAIDSAPGRILLAARDPKHDIILEGKKVVFKNFATGVKVLDPDTLDYRPSTKADLGNIARFCDSLEEVDFFTLAVSAQDVHPKVRDLHEGEVVLNNTAKHFSHDTQSIKSTKRFLEMAATIAGGMDQLRERPIVSLGTCPVSPLVLNAECTDLIIEAAQAGIPMNVLSMGLAGGTTPVTMAGTLVVTNAEVLGGIILAQLVNKGTPMMYGTSNTIMDLIYTTSPVGAPEHAMFSAAVGQLGHYYNIPTDVGGTOCDSKISDIQAGHEKTLTALLPALTGSNILYGMGLLESGIAFCYAQMLVDREFVRMVKKVMQGIAVHKDTLALEVIKAVG…
	Ga0180325_115207p08	dimethylamine:corrinoid methyltransferase	5609138..5610514	Ga0180325_115207 Ga0180325_115208	ATW27644.1 ATW27645.1	MVFTRLGDGTMIEAEISEIRADLEAGTQDAAARAEIAPLSADDLARLCDIVCRPGKVVGVEKGNEIIMTGDSPSIGSVPRGFPVNRIQMLQTYERVCGMDTAEAGFIDYSYKAIKTVASEERSWVEQASHILTIPLFYGAMPDLGRYSRPDGPVPNWAELLPQGKIAQARAAQEEAIELCVEDLVYVASEMYEGGAQGIDFDTSGAAGDADFYAALKATEILKKKYPEMCIEMGMAGEFVLGMHSELRYDGVRLAGLYPHDQVKLAQKAGVTIFGPVVNNVCNKSFSYNLARAVTFCKACADASGIPVHPNVGLGVGGVTTVEVLPVDVVSRVSVAMAEVAKADGLOVGSGDFCGMVATHTLASGMGGLRTAGDLVARMQMTRGMRIGEAKKYVADQLH…
	Ga0180325_115252s	betaine reductase complex selenoprotein B	5663441..5664736	Ga0180325_115252	ATW27680.1	MKKALLYVNQFFGGVGGEHHTDFEPIIKKGPIGPGLALKGALKGAEITHTVICGDNFMASNQEEALKRIEGFLSGKEFNLFLAGPAFRAGRYGVNCGEMCKFMYEKYGVMGVTSMHEENPGVEMYRENPFYILKGSEGAAKMRQDIAAMAAFANKLIAGEEILWASAEGYFPRGIRKEVFVDKTSADRSVDMLLAKLNGQPFETEFKIEVCDIVKPAKAVDIKKAKIGFISTGGLVPKGNPDHLPSGTSTIFIRYDISGMDSLKPGSYECIHGGSMPDKINANPEVLFPLATLKQLEKEGQIGEVDSYFYSTTGNLTSMKNATRIGAGIAESFKDNNIDAAILTSTUGSCTRCGATIVKEIERAGIPVAHICNLTAVAQITGSNRVIAGPCLNSPCCDV…
	Ga0180325_115257s	glycine/betaine/sarcosine reductase complex selenoprotein A	5667632..5668076	Ga0180325_115257	ATW27685.1	MLQGKKVAILGDRDGIPGPAIEECVKSAGAEVVFSTTECFVUTAAGAMDLENQARIKDLAEKYGNEDLIVVLGGAEAEASGLAAETVSTGDPTFAGPLSGVSLGLKAYHMFELKEEVDPGVYDEQISMMEMVLEVDEIINEVKTYRG*
	Ga0180325_115329p30	trimethylamine---corrinoid protein Co-methyltransferase	5755164..5756642	Ga0180325_115329 Ga0180325_115330	ATW27744.1 ATW28913.1	VVKRRISSGQAMLGGFGINIFTENDFMAIHYGTLEVLEKTGVFVDNPEAIDLYESGGARVDRSNKKVKIPASLVDECLHSAPKKVLLAGRDAKNDILLEGTRVHFCSFGIGLNVYDPFTGAYRKSTKKDVGDVARLCDYLEDIDMLECTLTPNDVHPNVYNLHILEANLRNTTKPCLSDPDPGLFPWILEMASAVAGGEDKLRERPIISGIVCPQSPMTFHHSCCEGIMQYARHELPMIVLPMAMAGGTSPVTLAGTVISHNVEVLAGLVLAQIVHKGAPIIYGSSTTMLDLKTATATVGCPELAMLNAALAKMAQFYLLPSWVAGGOADSKILDAQAGQEKMLTALLPALAGANMVFGSGMLESGIALSFGSLVADNENARMIRRVLQGIPVNDITMA…
	Ga0180325_115331p32	dimethylamine:corrinoid methyltransferase	5756725..5758116	Ga0180325_115331 Ga0180325_115332	ATW27745.1 ATW28914.1	MEKIMTFMGDGSRIFMNAAEIRADLESGTADAADRGKIPELTEDEINHLFDIITAKSKVVGVENGKEIVTTTDSGIKIPMQGFVPVDRSTNAQIHERVLCSDTFELSHIDYSFKQIKTILPTEQSVLEYTQMNMTAPVLYGAMPNLGLYTVPDGPVANWNELLPQGEIQAALAAQEEAVEYAVKDMVFVSGGMFDAGADGIDFDTVGASGDADFLAALKATQILREKYPDYAVEMGMAGEFVLGIHGDLYFGPDRLAGLYPHQQVRVAEKAGVTIFGPVVNTNSLRSFPWNIARVCTFIKACAEAARIPIHPNVGMGVGGIPLTLKVPVELATRAVKAIVEIGKADGLOTGEGDPFSTEAAFELAAGMGGIRTSGDLVARVQLAKALKIDEAKKYVAEK…
	Ga0180325_115773p74	trimethylamine---corrinoid protein Co-methyltransferase	6243806..6245314	Ga0180325_115773 Ga0180325_115774	ATW28974.1 ATW28113.1	LTVRGVHAGSHRMEGIGLNMFTYDELYDIHLATLDVLWNIGCKVESEEAVEIFDGAGCTIDRANHNVKIPAYLVEDALRSIPKTFRACGRNPENDWLNENNRTGFVNFGEAVQMIDPYTKEIRKPKKKDVDDVTRFCEAMDQIIIFERALGPSEVDPDVSQVHIAESFYNNCTKHAYIGMNRPENMRAVAKMGYVVSGGEDQFRQRPLFSQSTDPVSPLVHSKGATDTLIQAIRCGVPAKINSMGLCGGTTCVNLASTLVTHNAEMLSMFVLAQLVKKGHPLVYGTSTAIMDLRTTTACVGSPELALFSAACAKMAQFYNIPVWVAGG OTDSKVPDAQSAFEFCMTALLPALAGANMIYGLGLLEGGLTWDYAMLVMQNEMVKQILHCVKGIPVNDEE…
	Ga0180325_115799p00	dimethylamine:corrinoid methyltransferase	6269722..6271107	Ga0180325_115799 Ga0180325_115800	ATW28134.1 ATW28135.1	MKKYLTRYGDNYADFISGDQIKADIESGSQDAAERAHIPPLTQDEMDYLYEIIISPQKIVSVEPGNEVVVSFDAGTLKLPVRNGIPMDRLQAILTQERALASDSIELCHVDYSYKPVKAIISEERQTMEQAQLMTTLPLLYGAMPNLGLYTRPDGPVGNWSELLPAGKIAEAREAQEEAIQHAIRDIVFVASQMIESGADGINLDTVGASGDADVKASLEAVKILKQKYPQIGFETGMAGEFNMGMHGLLEIDGERIAGLYPHKQVKMAEKCGVSIFGMAVNTNSNMSLAWNLARVCTFAKETVKVSTIPVHANVGMGVGGIPLSLIPAADAVSRVDKALIEIAKVDGLOVGAGDTFGMAVTHEATAGMGGIRSAGDLVFRMELAGMKINEAKTFVAEK…
	Ga0180325_115804p05	trimethylamine---corrinoid protein Co-methyltransferase	6275841..6277319	Ga0180325_115804 Ga0180325_115805	ATW28979.1 ATW28139.1	VGRNLKAGYHRQDGFGLNMFSDDELYAIHCATLDVLKNSGIRILSKEAQDIYDGGGAIVDRKNNIVKIPPYMVEDAIQSAPSTLLLAGRNPKNDIVLEANRTGFTNFGEGIMIIDPYTKAYRRTTKKDVGDVARVCDALDAIDVHERAVSAQDVPAAVAPLHEVEINLTNTSKHLFQGCGGAKNLRKVVEMAAAVVGGKDKLRERPIYSCITCPVSPLQLVPESTEVIIECARLGVPINILSMALAGGTSAVTLAGTLVTHNAEVLGGIVLNQLTSKGAPVIYGSSTTMMDLKYTTSPVGCPELGMINAAVAKLAQYYLLPSWVAGGOADSKVPDAQAAHEKTITAILPALAGANLIYGLGMLELGMTMDYAQLVMDNEIARMIKQAVGGIDVTDEDLA…

## Sheet: Table S4
	Table S4. Bacterial 16S rRNA sequences identified in the PacBio sequencing data from the DFE culture. Sequences were identified with barrnap and mapped to the lowest possible taxonomic rank using the SILVA Alignment, Classification and Tree Service.
	Sequence Number	Cluster	SILVA Taxonomic Assigment	Sequence Identifier	Nucleotide Sequence
	1	1	Bacteria, Synergistetes, Synergistia, Synergistales, Synergistaceae, JGI-0000079-D21	16S_rRNA&a&ahcq25_WON710A1__SP16540.25&a3243-4761&c+&d	AGAGTTTGATCCTGGCTCAGGACGAACGCTGGCGGCGTGCTTAACACATGCAAGTCGGACGGTCAGCACTGGAAGGTTCGCTGGAAGGTGCTGGTAGTGGCGGACGGGTGAGTAACGCGTGAGGACATGGCTCCAGGAGGGGGATAACGTTTGGAAACGGACGCTAAGACCCCATAAGCCGGAAGGTGAAAGTGGGCAACCAGCCTGGAGAGTGACTCGCGTCCTATCAGCTAGTTGGTGGGGTGAAGGCCTACCAAGGCGATGACGGGTAGCCGACCTGAGAGGGTGGCCGGCCACACTGGAACTGAGATACGGTCCAGACTCCTACGGGAGGCAGCAGTGGGGAATATTGGGCAATGGGCGAAAGCCTGACCCAGCGACGCCGCGTGGGGGAAGAAG…
	2	1	Bacteria, Synergistetes, Synergistia, Synergistales, Synergistaceae, JGI-0000079-D21	16S_rRNA&a&ahcq52_WON710A1__SP16540.52&a26589-28107&c-&d	AGAGTTTGATCCTGGCTCAGGACGAACGCTGGCGGCGTGCTTAACACATGCAAGTCGGACGGTCAGCACTGGAAGGTTCGCTGGAAGGTGCTGGTAGTGGCGGACGGGTGAGTAACGCGTGAGGACATGGCTCCAGGAGGGGGATAACGTTTGGAAACGGACGCTAAGACCCCATAAGCCGGAAGGTGAAAGTGGGCAACCAGCCTGGAGAGTGACTCGCGTCCTATCAGCTAGTTGGTGGGGTGAAGGCCTACCAAGGCGATGACGGGTAGCCGACCTGAGAGGGTGGCCGGCCACACTGGAACTGAGATACGGTCCAGACTCCTACGGGAGGCAGCAGTGGGGAATATTGGGCAATGGGCGAAAGCCTGACCCAGCGACGCCGCGTGGGGGAAGAAG…
	3	1	Bacteria, Synergistetes, Synergistia, Synergistales, Synergistaceae, JGI-0000079-D21	16S_rRNA&a&ahcq46_WON710A1__SP16543.46&a14205-15722&c+&d	AGAGTTTGATCCTGGCTCAGGACGAACGCTGGCGGCGTGCTTAACACATGCAAGTCGGACGGTCAGCACTGGAAGGTTCGCTGGAAGGTGCTGGTAGTGGCGGACGGGTGAGTAACGCGTGAGGACATGGCTCCAGGAGGGGATAACGTTTGGAAACGGACGCTAAGACCCCATAAGCCGGAAGGTGAAAGTGGGCAACCAGCCTGGAGAGTGACTCGCGTCCTATCAGCTAGTTGGTGGGGTGAAGGCCTACCAAGGCGATGACGGGTAGCCGACCTGAGAGGGTGGCCGGCCACACTGGAACTGAGATACGGTCCAGACTCCTACGGGAGGCAGCAGTGGGGAATATTGGGCAATGGGCGAAAGCCTGACCCAGCGACGCCGCGTGGGGGAAGAAGT…
	4	1	Bacteria, Synergistetes, Synergistia, Synergistales, Synergistaceae, JGI-0000079-D21	16S_rRNA&a&ahcq43_WON710A1__SP16540.43&a610-2126&c+&d	AGAGTTTGATCCTGGCTCAGGACGAACGCTGGCGGCGTGCTTAACACATGCAAGTCGGACGGTCAGCACTGGAAGGTTCGCTGGAAGGTGCTGGTAGTGGCGGACGGGTGAGTAACGCGTGAGGACATGGCTCCAGGAGGGGGATAACGTTTGGAAACGGACGCTAAGACCCCATAAGCCGGAAGGTGAAAGTGGGCAACCAGCCTGGAGAGTGACTCGCGTCCTATCAGCTAGTTGGTGGGGTGAAGGCCTACCAAGGCGATGACGGGTAGCCGACCTGAGAGGGTGGCCGGCCACACTGGAACTGAGATACGGTCCAGACTCCTACGGGAGGCAGCAGTGGGGAATATTGGGCAATGGGCGAAAGCCTGACCCAGCGACGCCGCGTGGGGGAAGAAG…
	5	2	Bacteria, Spirochaetes, Spirochaetia, Spirochaetales, Spirochaetaceae, uncultured,	16S_rRNA&a&ahcq734_WON710A1__SP16540.734&a5831-7370&c-&d	AGAGTTTGATCCTGGCTCAGAACAAACGCTGGCGGCGTGTCTTAAGCATGCAAGTTGAGCGGCAAGGGGGAGCGATCCCCCCTAGAGCGGCGGACTGGTGAGTAACACGTGGATGATCTACCCGAGGCATGGGGATAGTCACTAGAAATAGTGGGTAATACCGAATACGGTGCGCATCGTGAGGGTGCGTAAGAAAGGTGCTACGGCACCGGCCTAGGATGAGTCTGCGTCCCATTAGCTGGTTGGTGAGGTAAGAGCCCACCAAGGCGATGATGGGTAGCCGGCCTGAGAGGGTGTACGGCCACACTGGGACTGAGATACGGCCCAGACTCCTACGGGAGGCAGCAGCTAAGAATATTCCGCAATGGACGAAAGTCTGACGGAGCGACGCCGCGTGGA…
	6	2	Bacteria, Spirochaetes, Spirochaetia, Spirochaetales, Spirochaetaceae, uncultured,	16S_rRNA&a&ahcq97_WON710A1__SP16540.97&a18203-19745&c+&d	AGAGTTTGATCCTGGCTCAGAACAAACGCTGGCGGCGTGTCTTAAGCATGCAAGTTGAGCGGCAAGGGGGAGCGATTCCTCCTAGAGCAGCGGACTGGTGAGTAACGCGTGGGTAATCTGCCTTGGGCATGGGGATAGCCATTAGAAATAGTGGGTAATACCGAATACGTTCCACGAGGGGAGTGCTTGTGGAAGAAAGGGTGCTATGGCACTGGCCTGAGATGAGCTCGCGTCCCATTAGCTAGTTGGTGAGGTAAAGGCCCACCAAGGCGATGATGGGTAGCCGGCCTGAGAGGGTGTACGGCCACACTGGGACTGAGATACGGCCCAGACTCCTACGGGAGGCAGCAGCTAAGAATATTCCGCAATGGACGGAAGTCTGACGGAGCGACGCCGCGT…
	7	2	Bacteria, Spirochaetes, Spirochaetia, Spirochaetales, Spirochaetaceae, uncultured,	16S_rRNA&a&ahcq391_WON710A1__SP16534.391&a567-2103&c+&d	AGAGTTTGATCCTGGCTCAGAACAAACGCTGGCGGCGTGTCTTAAGCATGCAAGTTGAGCGGCAAGGGGGAGCGATCCCTCCTAGAGCAGCGGACTGGTGAGTAACGCGTGGTAATCTGCCTTGGGCATGGGGATAGCCATTAGAAATAGTGGGTAATACCGAATACGTTCCACGAGGGGAGTGCTTGTGGAAGAAAGGTGCTACGGCACTGGCCTGAGATGAGCTCGCGTCCCATTAGCTAGTTGGTGAGGTAAAGGCCCACCAAGGCGATGATGGGTAGCCGGCCTGAGAGGGTGTACGGCCACACTGGGACTGAGATACGGCCCAGACTCCTACGGGAGGCAGCAGCTAAGAATATTCCGCAATGGACGGAAGTCTGACGGAGCGACGCCGCGTGG…
	8	2	Bacteria, Spirochaetes, Spirochaetia, Spirochaetales, Spirochaetaceae, uncultured,	16S_rRNA&a&ahcq100_WON710A1__SP16540.100&a233-1758&c+&d	AGAGTTTGATCCTGGCTCAGAACAAACGCTGGCGGCGTGTCTTAAGCATGCAAGTTGAGCGGCAAGGGGGAGCGATTCCTCCTAGAGCAGCGGACTGGTGAGTAACGCGTGGTAATCTGCCTTGGGCATGGGGATAGCCATTAGAAATAGTGGGTAATACCGAATACGTTCCACGGGGGGAGTGCTTGTGGAAGAAAGGGTGCTACGGCACTGGCCTGAGATAGCTCGCGTCCCATTAGCTAGTTGGTGAGGTAAAGGCCCACCAAGGCGATGATGGGTAGCCGGCCTGAGAGGGTGTACGGCCACACTGGGACTGAGATACGGCCCAGACTCCTACGGGAGGCAGCAGCTAAGAATATCCGCAATGGACGGAAGTCTGACGGAGCGACGCCGCGTGGA…
	9	2	Bacteria, Spirochaetes, Spirochaetia, Spirochaetales, Spirochaetaceae, uncultured,	16S_rRNA&a&ahcq361_WON710A1__SP16514.361&a1-1279&c+&d	GCGTCCCATTAGCTGGTTGGTGAGGTAAGGCCCACCAAGGCGATGATGGGTAGCCGGCCTGAGAGGTGTACGGCCACACTGGGACTGAGATACGGCCCAGACTCCTACGGGAGGCAGCAGCTAAGAATATTCCGCAATGGACGAAAGTCTGACGGAGCGACGCCGCGTGGATGAAGAAGGCCGAAAGGTTGTAAAGTTCTTTTGCTGGGGAAGAATAACCGGGAGGGAATGCCCGTGGGATGACAAGAACGGCGAATAAGCCCCGGCCAACTACGTGCCAGCAGCCGCGGTAACACGTAGGGGGCGAGCGTTGTTCGGAATTACTGGGCGTAAAGGGCATGTAGGCGGCTTGGAAGCCTGGCGTGAAACTGCAGCTTAAACTGGGTGCGCTGGAACTGC…
	10	3	Bacteria, Proteobacteria, Deltaproteobactera, Desulfovibrionales, Desulfovibrionaceae, Desulfovibrio,	16S_rRNA&a&ahcq117_WON710A1__SP16540.117&a11328-12872&c+&d	AGAGTTTGATTCTGGCTCAGATTGAACGCTGGCGGCGTGCCTAACACATGCAAGTCGTGCGTGAAAGGGCTTCGGCCTGAGTAAAGCGGCGCACGGGTGAGTAACGCGTGGATGATCTGCCCATGAGTTGGGAATAACGGCTGGAAACGGTCGCTAATACCGAATACGCTCCGATTTCACAGTTCGGGGGAAAGGTGGCCTCTGCTTGCAAGCTACCGCTCATGGATGAGTCCGCGTCCCATTAGCTAGTTGGCGGGGTAATGGCCCACCAAGGCGACGATGGGTAGCCGACCTGAGAGGGTGATCGGCCACACTGGGACTGGAACACGGCCCAGACTCCTACGGGAGGCAGCAGTGGGGAATATTGCGCAATGGGCGAAAGCCTGACGCAGCGACGCC…
	11	3	Bacteria, Proteobacteria, Deltaproteobactera, Desulfovibrionales, Desulfovibrionaceae, Desulfovibrio,	16S_rRNA&a&ahcq223_WON710A1__SP16540.223&a85-1629&c+&d	AGAGTTTGATTCTGGCTCAGATTGAACGCTGGCGGCGTGCCTAACACATGCAAGTCGTGCGTGAAAGGGCTTCGGCCTGAGTAAAGCGGCGCACGGGTGAGTAACGCGTGGATGATCTGCCCATGAGTTGGGAATAACGGCTGGAAACGGTCGCTAATACCGAATACGCTCCGATTTCACAGTTCGGGGGAAAGGTGGCCTCTGCTTGCAAGCTACCGCTCATGGATGAGTCCGCGTCCCATTAGCTAGTTGGCGGGGTAATGGCCCACCAAGGCGACGATGGGTAGCCGACCTGAGAGGGTGATCGGCCACACTGGGACTGGAACACGGCCCAGACTCCTACGGGAGGCAGCAGTGGGAATATTGCGCAATGGGCGAAAGCCTGACGCAGCGACGCCG…
	12	3	Bacteria, Proteobacteria, Deltaproteobactera, Desulfovibrionales, Desulfovibrionaceae, Desulfovibrio,	16S_rRNA&a&ahcq352_WON710A1__SP16540.352&a6597-8136&c+&d	AGAGTTTGATCCTGGCTCAGATTGAACGCTGGCGGCGTGCTTAACACATGCAAGTCGTGCGTGAAAGGGGACTTCGGCCTGAGTAGAGCGGCGCACGGGTGAGTAACGCGTGGTGATCTGCCCGGAAGTCTGGGATAACGGTGGGAAACTGCCGCTAATACCGTTACGCTTCCAATTCAGAATTGGGGGAAAGACGGCCTCTGCTTGCAAGCTGTCGCTTCGGATGAGCCCGCGTCCCATTAGCTCGTTGGCGGGGTAACGGCCCACCAAGGCAACGATGGGTAGCTGGTCTGAGAGGATGATCAGCCACACTGGGACTGAAACACGGCCCAGACTCCTACGGGAGGCAGCAGTGGGGAATATTGCGCAATGGGGGAAAGCCTGACGCAGCGACGCCGT…
	13	3	Bacteria, Proteobacteria, Deltaproteobactera, Desulfovibrionales, Desulfovibrionaceae, Desulfovibrio,	16S_rRNA&a&ahcq287_WON710A1__SP16540.287&a4502-6039&c+&d	AGAGTTTGATTCTGGCTCAGATTGAACGCTGGCGGCGTGCCTAACACATGCAAGTCGTGCGTGAAAGGGCTTCGGCCTGAGTAAAGCGGCGCACGGGTGAGTAACGCGTGGATGATCTGCCCATGAGTTGGGAATAACGGCTGGGAAACGGTCGCTAATACCGAATACGCTCCGATTTCACAGTTGGGGGAAAGGTGGCCTCTGCTTGCAAGCTACGCTCATGGATGAGTCCGCGTCCCATTAGCTAGTTGGCGGGGTAATGGCCCACCAAGGCGACGATGGGTAGCCGCCTGAGAGGGTGATCGCCACACTGGGACTGGAACACGGCCCAGACTCCTACGGGAGGCAGCAGTGGGGAATATTGCGCAATGGGCGAAAGCCTGACGCAGCGACGCCGCG…
	14	3	Bacteria, Proteobacteria, Deltaproteobactera, Desulfovibrionales, Desulfovibrionaceae, Desulfovibrio,	16S_rRNA&a&ahcq790_WON710A1__SP16543.790&a4278-5807&c-&d	TTTGATTCTGGCTCAGATTGAACGCTGGCGGCGTGCCTAACACATGCAAGTCGTGCGTGAAAGGGCTTCGGCCTGAGTAAAGCGGCGCACGGGTGAGTAACGCGTGGATGATCTGCCCATGAGTTGGGAATAACGGCTGGAAACGGTCGCTAATACCGAATACGCTCCGATTTCACAGTTCGGGGAAAGGTGGCCTCTGCTTGCAAGCTACCGCTCATGGATGAGTCCGCGTCCCATTAGCTAGTTGGCGGGGTAATGGCCCACCAAGGCGACGATGGGTAGCCGACCTGAGAGGGTGATCGGCCACACTGGGACTGGAACACGGCCCAGACTCCTACGGAGGCAGCAGTGGGGAATATTGCGCAATGGGCGAAAGCCTGACGCAGCGACGCCGCGTGA…
	15	4	Bacteria, Firmicutes, Clostridia, Clostridiales, Peptococcaceae,	prok_WON710A1__DCMF160804.P00661	AACCTGCCCTAGAAACCGGGACAACAGCTGGAAACGGCTGCTAATACCGGATAAGTTCATTAAGAGGCATCTCTTGATGAAGAAAGGTGGCCTCTGAAGATGCTACCGATCAAGGATGGACCCGCGTCTGATTAGCTAGTTGGCAGGGTAGAAGCCTACCAAGGCGACGATCAGTAGCCGGCCTGAGAGGGTGACCGGCCACACTGGGACTGAGACACGGCCCAGACTCCTACGGGAGGCAGCAGTGGGGAATCTTCCGCAATGGGCGAAAGCCTGACGGAGCAACGCCGCGTGAATGAAGAAGGCCTTCGGGTCGTAAAGTTCTGTCTTTAGGGAAGAAGACTTTCTATGTAAACAATGTAGGAAGGAGACGGTACCTAAGGAGGAAGCTCCGGCTAA…
	16	4	Bacteria, Firmicutes, Clostridia, Clostridiales, Peptococcaceae,	prok_WON710A1__DCMF160804.P00673	AACCTGCCCTAGAAACCGGGACAACAGCTGGAAACGGCTGCTAATACCGGATAAGTTCATTAAGAGGCATCTCTTAATGAAGAAAGGTGGCCTCTGAAGATGCTACCGATCAAGGATGGACCCGCGTCTGATTAGCTAGTTGGCAGGGTAGAAGCCTACCAAGGCGACGATCAGTAGCCGGCCTGAGAGGGTGACCGGCCACACTGGGACTGAGACACGGCCCAGACTCCTACGGGAGGCAGCAGTGGGGAATCTTCCGCAATGGGCGAAAGCCTGACGGAGCAACGCCGCGTGAATGAAGAAGGCCTTCGGGTCGTAAAGTTCTGTCTTTAGGGAAGAAGACTTTCTATGTAAACAATGTAGGAAGGAGACGGTACCTAAGGAGGAAGCTCCGGCTAA…
	17	4	Bacteria, Firmicutes, Clostridia, Clostridiales, Peptococcaceae,	prok_WON710A1__DCMF160804.P03735	AACCTGCCCTAGAAACCGGGACAACAGCTGGAAACGGCTGCTAATACCGGATAAGTTCATTAAGAGGCATCTCTTGATGAAGAAAGGTGGCCTCTGAAGATGCTACCGATCAAGGATGGACCCGCGTCTGATTAGCTAGTTGGCAGGGTAGAAGCCTACCAAGGCGACGATCAGTAGCCGGCCTGAGAGGGTGACCGGCCACACTGGGACTGAGACACGGCCCAGACTCCTACGGGAGGCAGCAGTGGGGAATCTTCCGCAATGGGCGAAAGCCTGACGGAGCAACGCCGCGTGAATGAAGAAGGCCTTCGGGTCGTAAAGTTCTGTCTTTAGGGAAGAAGACTTTCTATGTAAACAATGTAGGAAGGAGACGGTACCTAAGGAGGAAGCTCCGGCTAA…
	18	4	Bacteria, Firmicutes, Clostridia, Clostridiales, Peptococcaceae,	prok_WON710A1__DCMF160804.P04460	ATTAGGTAGTTGGCGGAGTAACGGCCCACCAAGCCAACGATGGATAGCTGGTCTGAGAGGATGATCAGCCACACTGGAACTGAGACACGGTCCAGACTCCTACGGGAGGCAGCAGTAAGGAATATTGCTCAATGGCCGAAAGGCTGAAGCAGCAACGCCGCGTGAAGGATGAAGGGTCTTTGGCTTGTAAACTTCTGTAAAAGGGGAAAAATAATCCCGCATTGCGGACTTGATTGTACCCTTAAAGTAAGCCCCGGCTAACTACGTGCCAGCAGCCGCGGTAATACGTAGGGGCAAGCGTTGTCCGGATTTACTGGGTGTAAAGGGTGCTCAGGCGGTTTGTAAGTCAGTGGTGAAATCCCGGGCTTAACTCCGGAACTGCCATAGAAACTGCAAGCC…
	19	5	Bacteria, Bacteroidetes, Bacteroidia, Sphingobacteriales, Lentimicrobiaceae,	16S_rRNA&a&ahcq127_WON710A1__SP16540.127&a22604-24125&c+&d	AGAGTTTGATCCTGGCTCAGGATGAACGCTAGCGGCAGGCTTAATACATGCAAGTTGTACGGGATTTCGGGTAGCAATACCTGGATGAGAGTAGCGCACGGGTGCGTAACGCGTATGCAACCTACCTTTAACTAGGACACAACCATGAGAAATTGTGGCTAATATCCCATAACACTGCGATGTGGCATCACATTGCAGTTAAAGCTCCGGCGGTTATAGATGGGCATGCGTGACATTAGCTAGTTGGTGAGGTAACGGCTCACCAAGGCTACGATGTCTAGGGGTTCTGAGAGGATTATCCCCCACACTGGTACTGAGACACGGACCAGACTCCTACGGGAGGCAGCAGTAAGGAATATTGGGCAATGGACGCAAGTCTGACCCAGCCATGCCGCGTGA…
	20	5	Bacteria, Bacteroidetes, Bacteroidia, Sphingobacteriales, Lentimicrobiaceae,	16S_rRNA&a&ahcq631_WON710A1__SP16543.631&a6578-7597&c-&d	TCCGTGCCAGCAGCCGCGGTAATACGGAGGATGCAAGCGTTATCCGGATTCATTGGGTTTAAAGGGTGCGCAGGCGGATTAATAAGTCAGTGGTGAAATCCTACGGCTCAACTGTAGAACTGCCATTGATACTGTTAGTCTTGAGTATTGTTGAGGTAGGCGGAATGTGTCATGTAGCGGTGAAATGCTTAGATATGACACAGAACACCAATCGCGAAGGCAGCTTACCAAGCAATAACTGACGCTCATGCACGAAAGCGTGGGGATCAAACAGGATTAGATACCCTGGTAGTCCACGCTGTAAACGATGAACACTCGATGTTGGCGATACACAGTCAGCGTCTGAGCGAAAGTATTAAGTGTTCCACCTGGGGAGTACGGTCGCAAGATTGAAACTCA…
	21	6	Bacteria, Bacteroidetes, Ignavibacteria, SJA-28	16S_rRNA&a&ahcq20_WON710A1__SP16540.20&a66441-67959&c-&d	AGAGTTTGATCCTGGCTCAGGACGAACGCTGGCGGCGTGCTTAATACATGCAAGTCTACGATTTTTAAGGTAGCAATATTTTAAAGAGAGTGGCGCACGGGTGAGTAACACGTAGGTAATCTGCCTTTAGGTCTGACACAACTCGTCGAAAGACGGGCTAATATCAGATAATGCAGCGATCCGGCATCGGGTTGTTGTCAAAGCTTCGGCGCCCAAAGATGAGCCTGCGGTCCATTAGGTAGTTGGCGGAGTAACGGCCCACCAAGCCAACGATGGATAGCTGGTCTGAGAGGATGATCAGCCACACTGGAACTGAGACACGGTCCAGACTCCTACGGGAGGCAGCAGTAAGGAATATTGCTCAATGGCCGAAAGGCTGAAGCAGCAACGCCGCGTGAA…

## Sheet: Table S5
	Table S5. Genes used for phylogenetic analysis in DCMF and their TaxaMap predicted taxonomic group at the genus, family, and order level.
	JGI Gene Locus	Description	Length (bp)	Genus	Family	Order
	General Housekeeping Proteins
	Ga0180325_111174	malate dehydrogenase (oxaloacetate-decarboxylating)	410	Dehalobacterium	Peptococcaceae	Clostridiales
	Ga0180325_111249	malate dehydrogenase (oxaloacetate-decarboxylating)	410	Dehalobacterium	Peptococcaceae	Clostridiales
	Ga0180325_112460	malate dehydrogenase (oxaloacetate-decarboxylating)	411	Blautia; Chloroflexi gen.; Clostridiaceae gen.; Ruminiclostridium	Chloroflexi fam.; Clostridiaceae; Lachnospiraceae; Ruminococcaceae	Chloroflexi ord.; Clostridiales
	Ga0180325_113287	malate dehydrogenase (oxaloacetate-decarboxylating)	410	Dehalobacterium	Peptococcaceae	Clostridiales
	Ga0180325_112400	molecular chaperone DnaK	613	Dehalobacterium	Peptococcaceae	Clostridiales
	Ga0180325_113832	molecular chaperone DnaK	621	Dehalobacterium	Peptococcaceae	Clostridiales
	Ga0180325_114556	translation elongation factor EF-Tu	402	Dehalobacterium	Peptococcaceae	Clostridiales
	Ga0180325_114570	translation elongation factor EF-Tu	402	Dehalobacterium	Peptococcaceae	Clostridiales
	Ribosomal Proteins
	Ga0180325_11647	LSU ribosomal protein L35P	66	Dehalobacterium	Peptococcaceae	Clostridiales
	Ga0180325_11648	LSU ribosomal protein L20P	112	Bacillus; Clostridiaceae gen.; Dehalobacter; Dehalobacterium; Desulfitobacterium; Desulfosporosinus; Desulfotomaculum; Moorella; Pelotomaculum	Bacillaceae; Clostridiaceae; Peptococcaceae; Thermoanaerobacteraceae	Bacillales; Clostridiales; Thermoanaerobacterales
	Ga0180325_111004	SSU ribosomal protein S15P	91	Dehalobacterium	Peptococcaceae	Clostridiales
	Ga0180325_111410	SSU ribosomal protein S2P	233	Dehalobacterium	Peptococcaceae	Clostridiales
	Ga0180325_111465	LSU ribosomal protein L19P	114	Dehalobacterium	Peptococcaceae	Clostridiales
	Ga0180325_111488	SSU ribosomal protein S16P	87	Dehalobacterium	Peptococcaceae	Clostridiales
	Ga0180325_111559	LSU ribosomal protein L32P	60	Dehalobacterium	Peptococcaceae	Clostridiales
	Ga0180325_111587	LSU ribosomal protein L28P	63	Clostridiaceae gen.; Dehalobacter; Dehalobacterium; Desulfitobacterium; Desulfosporosinus; Desulfotomaculum; Heliobacterium; Moorella; Syntrophobotulus; Syntrophomonas; Thermacetogenium; Thermincola	Clostridiaceae; Heliobacteriaceae; Peptococcaceae; Syntrophomonadaceae; Thermoanaerobacteraceae	Clostridiales; Thermoanaerobacterales
	Ga0180325_112394	SSU ribosomal protein S21P	59	Dehalobacter; Dehalobacterium; Desulfitobacterium; Desulfosporosinus; Selenomonas; Thermincola; Veillonella	Peptococcaceae; Selenomonadaceae; Veillonellaceae	Clostridiales; Selenomonadales; Veillonellales
	Ga0180325_112549	LSU ribosomal protein L27P	89	Dehalobacterium	Peptococcaceae	Clostridiales
	Ga0180325_113107	SSU ribosomal protein S30P /sigma 54 modulation protein	174	Dehalobacterium	Peptococcaceae	Clostridiales
	Ga0180325_113177	LSU ribosomal protein L31P	68	Dehalobacterium	Peptococcaceae	Clostridiales
	Ga0180325_113482	LSU ribosomal protein L9P	149	Dehalobacterium	Peptococcaceae	Clostridiales
	Ga0180325_113486	SSU ribosomal protein S18P	90	Dehalobacterium	Peptococcaceae	Clostridiales
	Ga0180325_114557	LSU ribosomal protein L33P	50	Dehalobacterium	Peptococcaceae	Clostridiales
	Ga0180325_114560	LSU ribosomal protein L11P	142	Dehalobacterium	Peptococcaceae	Clostridiales
	Ga0180325_114561	LSU ribosomal protein L1P	233	Dehalobacterium	Peptococcaceae	Clostridiales
	Ga0180325_114562	LSU ribosomal protein L10P	177	Dehalobacterium	Peptococcaceae	Clostridiales
	Ga0180325_114563	LSU ribosomal protein L12P	127	Dehalobacterium	Peptococcaceae	Clostridiales
	Ga0180325_114566	LSU ribosomal protein L7AE	82	Dehalobacterium	Peptococcaceae	Clostridiales
	Ga0180325_114567	SSU ribosomal protein S12P	129	Dehalobacterium	Peptococcaceae	Clostridiales
	Ga0180325_114568	SSU ribosomal protein S7P	157	Dehalobacterium	Peptococcaceae	Clostridiales
	Ga0180325_114571	SSU ribosomal protein S10P	103	Clostridiaceae gen.	Clostridiaceae	Clostridiales
	Ga0180325_114572	LSU ribosomal protein L3P	210	Dehalobacterium	Peptococcaceae	Clostridiales
	Ga0180325_114573	LSU ribosomal protein L4P	209	Dehalobacterium	Peptococcaceae	Clostridiales
	Ga0180325_114574	LSU ribosomal protein L23P	96	Dehalobacterium	Peptococcaceae	Clostridiales
	Ga0180325_114575	LSU ribosomal protein L2P	277	Dehalobacterium	Peptococcaceae	Clostridiales
	Ga0180325_114576	SSU ribosomal protein S19P	95	Ammonifex; Caldicellulosiruptor; Candidatus Desulforudis; Carboxydothermus; Clostridiaceae gen.; Dehalobacterium; Desulfotomaculum; Gottschalkia; Halothermothrix; Moorella; Pelotomaculum; Ruminiclostridium; Thermacetogenium; Thermincola	Clostridiaceae; Gottschalkiaceae; Halanaerobiaceae; Peptococcaceae; Ruminococcaceae; Thermoanaerobacteraceae; Thermoanaerobacterales Family III. Incertae Sedis	Clostridiales; Halanaerobiales; Thermoanaerobacterales; Tissierellales
	Ga0180325_114577	LSU ribosomal protein L22P	114	Dehalobacterium	Peptococcaceae	Clostridiales
	Ga0180325_114578	SSU ribosomal protein S3P	222	Dehalobacterium	Peptococcaceae	Clostridiales
	Ga0180325_114579	LSU ribosomal protein L16P	145	Dehalobacterium	Peptococcaceae	Clostridiales
	Ga0180325_114580	LSU ribosomal protein L29P	68	Dehalobacterium	Peptococcaceae	Clostridiales
	Ga0180325_114581	SSU ribosomal protein S17P	88	Dehalobacterium	Peptococcaceae	Clostridiales
	Ga0180325_114582	LSU ribosomal protein L14P	123	Dehalobacterium	Peptococcaceae	Clostridiales
	Ga0180325_114583	LSU ribosomal protein L24P	110	Dehalobacterium	Peptococcaceae	Clostridiales
	Ga0180325_114584	LSU ribosomal protein L5P	180	Dehalobacterium	Peptococcaceae	Clostridiales
	Ga0180325_114585	SSU ribosomal protein S8P	133	Dehalobacterium	Peptococcaceae	Clostridiales
	Ga0180325_114586	LSU ribosomal protein L6P	181	Dehalobacterium	Peptococcaceae	Clostridiales
	Ga0180325_114587	LSU ribosomal protein L18P	121	Dehalobacterium	Peptococcaceae	Clostridiales
	Ga0180325_114588	SSU ribosomal protein S5P	167	Dehalobacterium	Peptococcaceae	Clostridiales
	Ga0180325_114589	LSU ribosomal protein L30P	63	Dehalobacterium	Peptococcaceae	Clostridiales
	Ga0180325_114590	LSU ribosomal protein L15P	147	Dehalobacterium	Peptococcaceae	Clostridiales
	Ga0180325_114597	SSU ribosomal protein S11P	129	Dehalobacterium	Peptococcaceae	Clostridiales
	Ga0180325_114598	SSU ribosomal protein S4P	209	Dehalobacterium	Peptococcaceae	Clostridiales
	Ga0180325_114600	LSU ribosomal protein L17P	113	Dehalobacterium	Peptococcaceae	Clostridiales
	Ga0180325_114605	LSU ribosomal protein L13P	145	Dehalobacterium	Peptococcaceae	Clostridiales
	Ga0180325_114606	SSU ribosomal protein S9P	131	Dehalobacterium	Peptococcaceae	Clostridiales

## Sheet: Table S6
	Table S6. Genes included in the predicted genome-based metabolic model depicted in Figure 6.
	Gene	Protein Product	JGI Gene Locus	GenBank Accession
	Wood-Ljungdahl pathway, carbonyl branch
		Acetyl-CoA synthase corrinoid activation protein (Ferredoxin)	Ga0180325_111202	ATW24372.1
	acsE	5-methyltetrahydrofolate:corrinoid/iron sulfur protein co-methyltransferase	Ga0180325_111199	ATW24372.1
	acsD	acetyl-CoA synthase corrinoid iron-sulfur protein, small subunit; CO dehydrogenase/acetyl-CoA synthase delta subunit	Ga0180325_111200	ATW24370.1
	acsC	acetyl-CoA synthase corrinoid iron-sulfur protein, large subunit; acetyl-CoA decarbonylase/synthase complex gamma subunit	Ga0180325_111203	ATW24373.1
	acsB	CO-methylating acetyl-CoA synthase; CO dehydrogenase/acetyl-CoA synthase alpha subunit	Ga0180325_111204	ATW24374.1
	cooC	CO dehydrogenase maturation protein	Ga0180325_111201	ATW24371.1
			Ga0180325_111206	ATW24376.1
	cooT	CO dehydrogenase maturation protein	Ga0180325_115201	ATW27639.1 ATW23946.1
			Ga0180325_11684
	cooS (acsA)	CO dehydrogenase (acceptor)	Ga0180325_111205	ATW24375.1
			Ga0180325_11614	ATW23896.1
			Ga0180325_113455	ATW26211.1
	cooA	CO-responsive transcriptional activator	Ga0180325_113457	ATW26212.1
	cooF	CO dehydrogenase iron-sulfur protein	Ga0180325_113456	ATW28682.1
	Wood-Ljungdahl pathway, methyl branch
	metF	methylenetetrahydrofolate reductase [NAD(P)H]	Ga0180325_111198	ATW24368.1
	fhs	formate-tetrahydrofolate ligase	Ga0180325_114722	ATW27246.1
	fdhF	formate dehyrogenase, alpha subunit	Ga0180325_112878s80	ATW28615.1
	hoxE	formate dehydrogenase gamma subunit (NAD+-reducing hydrogenase)	Ga0180325_112877	DCMF_14060a
	hoxF	formate dehydrogenase beta subunit (NAD+-reducing hydrogenase)	Ga0180325_112876	ATW25736.1
	folD	methylenetetrahydrofolate dehydrogenase(NADP+)/methenyltetrahydrofolate cyclohydrase	Ga0180325_11378	ATW23695.1
	Acetate metabolism
	pduL	phosphate propanoyltransferase	Ga0180325_112350	ATW28552.1 ATW25703.1 ATW28951.1
			Ga0180325_112835
			Ga0180325_115608
	ackA	acetate kinase	Ga0180325_111561	ATW28444.1
	acsA	acetate-CoA ligase	Ga0180325_115029	ATW27500.1
	Pyruvate metabolism
	por	pyruvate synthase (PFOR)	Ga0180325_113745	ATW26431.1
	pflD	pyruvate formate-lyase 2	Ga0180325_115273	ATW28904.1
	pflA	[formate-C-acetyltransferase]-activating enzyme	Ga0180325_115274	ATW28905.1
	Glycine/betaine/sarcosine reductase clusters
	grdE/G	glycine/sarcosine reductase complex, protein B subunits alpha and beta	Ga0180325_114453	ATW27032.1
	grdB/F	glycine/sarcosine reductase complex, protein B subunit gamma	Ga0180325_114454s56
	trxB	thioredoxin reductase (NADPH)	Ga0180325_114672	ATW27203.1
	grdA	glycine reductase complex selenoprotein A	Ga0180325_114673s74
	grdB/F	glycine/sarcosine reductase complex, protein B subunits alpha and beta	Ga0180325_114675s76
	grdE/G	glycine/sarcosine reductase complex, protein B subunit gamma	Ga0180325_114677	ATW27208.1
	trxA	thioredoxin 1	Ga0180325_114679	ATW27210.1
	grdA	glycine reductase complex selenoprotein A	Ga0180325_114680s81
	grdC	glycine/sarcosine/betaine reductase complex, protein C subunit beta	Ga0180325_114682	ATW27213.1
	grdD	glycine/sarcosine/betaine reductase complex, protein C subunit alpha	Ga0180325_114683	ATW27214.1
	grdE/G	glycine/sarcosine reductase complex, protein B subunit gamma	Ga0180325_114684	ATW27215.1
	grdB/F	glycine/sarcosine reductase complex, protein B subunits alpha and beta	Ga0180325_114685s86
	trxB	thioredoxin reductase (NADPH)	Ga0180325_114795	ATW27299.1
	trxA	thioredoxin 1	Ga0180325_114796	ATW27300.1
	grdA	glycine reductase complex selenoprotein A	Ga0180325_114797s98
	grdC	glycine/sarcosine/betaine reductase complex, protein C subunit beta	Ga0180325_114799	ATW27303.1
	grdD	glycine/sarcosine/betaine reductase complex, protein C subunit alpha	Ga0180325_114800	DCMF_23395a
	grdE	glycine reductase complex, protein B subunit gamma	Ga0180325_114802	ATW27305.1
	grdB	glycine reductase complex, protein B subunits alpha and beta	Ga0180325_114803s
	grdE/G	glycine/sarcosine reductase complex, protein B subunit gamma	Ga0180325_114854	ATW27351.1
	grdB/F	glycine/sarcosine reductase complex, protein B subunits alpha and beta	Ga0180325_114855s
	trxB	thioredoxin reductase (NADPH)	Ga0180325_114858	ATW27355.1
	trxA	thioredoxin 1	Ga0180325_114859	ATW27356.1
	grdA	glycine reductase complex selenoprotein A	Ga0180325_114860s61
	grdC	glycine/sarcosine/betaine reductase complex, protein C subunit beta	Ga0180325_114862	ATW27359.1
	grdD	glycine/sarcosine/betaine reductase complex, protein C subunit alpha	Ga0180325_114863	ATW27360.1
	grdI	betaine reductase complex, protein B subunit alpha	Ga0180325_115251	ATW27679.1
	grdH	betaine reductase complex, protein B subunit beta	Ga0180325_115252s
	trxB	thioredoxin reductase (NADPH)	Ga0180325_115255	ATW27682.1
	trxA	thioredoxin 1	Ga0180325_115256	ATW27683.1
	grdA	glycine reductase complex selenoprotein A	Ga0180325_115257s
	grdC	glycine/sarcosine/betaine reductase complex, protein C subunit beta	Ga0180325_115258	ATW27686.1
	grdD	glycine/sarcosine/betaine reductase complex, protein C subunit alpha	Ga0180325_115259	ATW27687.1
	Methylamine methyltransferases
	mttB	trimethylamine---corrinoid protein Co-methyltransferase	Ga0180325_1145	ATW23426.1
		trimethylamine---corrinoid protein Co-methyltransferase	Ga0180325_1148	ATW28259.1
		trimethylamine---corrinoid protein Co-methyltransferase	Ga0180325_11427	ATW28303.1
		Trimethylamine methyltransferase (MTTB)	Ga0180325_11429	DCMF_02070a
		Trimethylamine methyltransferase (MTTB)	Ga0180325_11430	DCMF_02070a
		trimethylamine---corrinoid protein Co-methyltransferase	Ga0180325_11437	ATW23746.1
		trimethylamine---corrinoid protein Co-methyltransferase	Ga0180325_111152	ATW24331.1
		trimethylamine---corrinoid protein Co-methyltransferase	Ga0180325_111154	DCMF_05620a
		trimethylamine---corrinoid protein Co-methyltransferase	Ga0180325_111273	ATW24431.1
		trimethylamine---corrinoid protein Co-methyltransferase	Ga0180325_111278p79
		trimethylamine---corrinoid protein Co-methyltransferase	Ga0180325_111485p86
		trimethylamine---corrinoid protein Co-methyltransferase	Ga0180325_111611	ATW24703.1
		trimethylamine---corrinoid protein Co-methyltransferase	Ga0180325_111620p21
		trimethylamine---corrinoid protein Co-methyltransferase	Ga0180325_111622p23
		Trimethylamine:corrinoid methyltransferase	Ga0180325_111747	ATW24813.1
		Trimethylamine:corrinoid methyltransferase	Ga0180325_111796	ATW24852.1
		trimethylamine---corrinoid protein Co-methyltransferase	Ga0180325_111932	ATW24965.1
		Trimethylamine:corrinoid methyltransferase	Ga0180325_112298	ATW25266.1
		Trimethylamine:corrinoid methyltransferase	Ga0180325_112449	ATW25398.1
		Trimethylamine:corrinoid methyltransferase	Ga0180325_112722	ATW25609.1
		trimethylamine---corrinoid protein Co-methyltransferase	Ga0180325_112971	ATW25814.1
		trimethylamine---corrinoid protein Co-methyltransferase	Ga0180325_113359	ATW26133.1
		trimethylamine---corrinoid protein Co-methyltransferase	Ga0180325_113361p62
		trimethylamine---corrinoid protein Co-methyltransferase	Ga0180325_113424	ATW28676.1
		trimethylamine---corrinoid protein Co-methyltransferase	Ga0180325_113619	ATW28706.1
		trimethylamine---corrinoid protein Co-methyltransferase	Ga0180325_113623	ATW26342.1
		trimethylamine---corrinoid protein Co-methyltransferase	Ga0180325_113625	ATW26344.1
		trimethylamine---corrinoid protein Co-methyltransferase	Ga0180325_113659	ATW26368.1
		trimethylamine---corrinoid protein Co-methyltransferase	Ga0180325_113661	ATW26369.1
		trimethylamine---corrinoid protein Co-methyltransferase	Ga0180325_113762	ATW26446.1
		trimethylamine---corrinoid protein Co-methyltransferase	Ga0180325_113763	ATW26447.1
		trimethylamine---corrinoid protein Co-methyltransferase	Ga0180325_113827	ATW26502.1
		trimethylamine---corrinoid protein Co-methyltransferase	Ga0180325_113830	ATW26504.1
		trimethylamine---corrinoid protein Co-methyltransferase	Ga0180325_114069	ATW26716.1
		trimethylamine---corrinoid protein Co-methyltransferase	Ga0180325_114148	ATW26781.1
		trimethylamine---corrinoid protein Co-methyltransferase	Ga0180325_114152	ATW26785.1
		trimethylamine---corrinoid protein Co-methyltransferase	Ga0180325_114153	ATW26786.1
		trimethylamine---corrinoid protein Co-methyltransferase	Ga0180325_114318	ATW26918.1
		trimethylamine---corrinoid protein Co-methyltransferase	Ga0180325_114324p25
		trimethylamine---corrinoid protein Co-methyltransferase	Ga0180325_114447	ATW27027.1
		trimethylamine---corrinoid protein Co-methyltransferase	Ga0180325_114448	ATW27028.1
		trimethylamine---corrinoid protein Co-methyltransferase	Ga0180325_114458	DCMF_21745a
		trimethylamine---corrinoid protein Co-methyltransferase	Ga0180325_114459	ATW27035.1
		trimethylamine---corrinoid protein Co-methyltransferase	Ga0180325_114474	ATW27047.1
		trimethylamine---corrinoid protein Co-methyltransferase	Ga0180325_114648	ATW27181.1
		trimethylamine---corrinoid protein Co-methyltransferase	Ga0180325_114725	ATW27249.1
		trimethylamine---corrinoid protein Co-methyltransferase	Ga0180325_114729p30
		trimethylamine---corrinoid protein Co-methyltransferase	Ga0180325_114735	ATW28836.1
		trimethylamine---corrinoid protein Co-methyltransferase	Ga0180325_114737	ATW28837.1
		trimethylamine---corrinoid protein Co-methyltransferase	Ga0180325_114740	ATW27261.1
		trimethylamine---corrinoid protein Co-methyltransferase	Ga0180325_114888p89
		trimethylamine---corrinoid protein Co-methyltransferase	Ga0180325_114890	ATW27381.1
		trimethylamine---corrinoid protein Co-methyltransferase	Ga0180325_114961p62
		trimethylamine---corrinoid protein Co-methyltransferase	Ga0180325_114963	ATW27444.1
		trimethylamine---corrinoid protein Co-methyltransferase	Ga0180325_115204p05
		trimethylamine---corrinoid protein Co-methyltransferase	Ga0180325_115206	ATW27643.1
		trimethylamine:corrinoid methyltransferase	Ga0180325_115328	ATW27743.1
		trimethylamine---corrinoid protein Co-methyltransferase	Ga0180325_115329p30
		trimethylamine---corrinoid protein Co-methyltransferase	Ga0180325_115353	ATW27762.1
		trimethylamine---corrinoid protein Co-methyltransferase	Ga0180325_115413	ATW28925.1
		trimethylamine---corrinoid protein Co-methyltransferase	Ga0180325_115414	ATW28926.1
		trimethylamine---corrinoid protein Co-methyltransferase	Ga0180325_115415	ATW27817.1
		trimethylamine---corrinoid protein Co-methyltransferase	Ga0180325_115426	ATW28928.1
		trimethylamine---corrinoid protein Co-methyltransferase	Ga0180325_115429	ATW27830.1
		trimethylamine---corrinoid protein Co-methyltransferase	Ga0180325_115430	ATW27831.1
		trimethylamine---corrinoid protein Co-methyltransferase	Ga0180325_115467	ATW27864.1
		trimethylamine---corrinoid protein Co-methyltransferase	Ga0180325_115469	ATW27866.1
		trimethylamine---corrinoid protein Co-methyltransferase	Ga0180325_115476	ATW27872.1
		trimethylamine:corrinoid methyltransferase	Ga0180325_115483	ATW27879.1
		trimethylamine---corrinoid protein Co-methyltransferase	Ga0180325_115494	ATW27888.1
		trimethylamine---corrinoid protein Co-methyltransferase	Ga0180325_115497	ATW27890.1
		trimethylamine---corrinoid protein Co-methyltransferase	Ga0180325_115518	ATW27906.1
		trimethylamine---corrinoid protein Co-methyltransferase	Ga0180325_115521	ATW28939.1
		trimethylamine---corrinoid protein Co-methyltransferase	Ga0180325_115531	ATW27917.1
		trimethylamine---corrinoid protein Co-methyltransferase	Ga0180325_115637	ATW28000.1
		trimethylamine---corrinoid protein Co-methyltransferase	Ga0180325_115638	ATW28001.1
		trimethylamine---corrinoid protein Co-methyltransferase	Ga0180325_115653	ATW28012.1
		trimethylamine---corrinoid protein Co-methyltransferase	Ga0180325_115773p74
		trimethylamine---corrinoid protein Co-methyltransferase	Ga0180325_115779	ATW28976.1
		trimethylamine:corrinoid methyltransferase	Ga0180325_115804p05
		trimethylamine---corrinoid protein Co-methyltransferase	Ga0180325_115807	ATW28141.1
		trimethylamine---corrinoid protein Co-methyltransferase	Ga0180325_115897	ATW28983.1
	mtbB	dimethylamine:corrinoid methyltransferase	Ga0180325_111271p72
		dimethylamine:corrinoid methyltransferase	Ga0180325_113356p57
		dimethylamine:corrinoid methyltransferase	Ga0180325_114321p22
		dimethylamine:corrinoid methyltransferase	Ga0180325_114726p27
		dimethylamine:corrinoid methyltransferase	Ga0180325_115207p08
		dimethylamine:corrinoid methyltransferase	Ga0180325_115331p32
		dimethylamine:corrinoid methyltransferase	Ga0180325_115799p00
	mtmB	monomethylamine:corrinoid methyltransferase	Ga0180325_11457	ATW23764.1
		monomethylamine:corrinoid methyltransferase	Ga0180325_111511	ATW24628.1
		monomethylamine:corrinoid methyltransferase	Ga0180325_111676	ATW24755.1
		monomethylamine:corrinoid methyltransferase	Ga0180325_111805	ATW24858.1
		monomethylamine:corrinoid methyltransferase	Ga0180325_111810	ATW24863.1
		monomethylamine:corrinoid methyltransferase	Ga0180325_112547p48
		monomethylamine:corrinoid methyltransferase	Ga0180325_113009	ATW25845.1
		monomethylamine:corrinoid methyltransferase	Ga0180325_115013	ATW27486.1
	mtaA/mtbA	[methyl-Co(III) methanol-specific corrinoid protein]:coenzyme M methyltransferase	Ga0180325_111151	ATW28382.1
		[methyl-Co(III) methanol-specific corrinoid protein]:coenzyme M methyltransferase	Ga0180325_111155	ATW24333.1
		methyltransferase, MtaA/CmuA family	Ga0180325_111233	ATW24397.1
		[methyl-Co(III) methanol-specific corrinoid protein]:coenzyme M methyltransferase	Ga0180325_111671	ATW28459.1
		[methyl-Co(III) methanol-specific corrinoid protein]:coenzyme M methyltransferase	Ga0180325_111674	ATW24753.1
		methanol-specific methylcobalamin: coenzyme M methyltransferase	Ga0180325_112541	ATW25478.1
		[methyl-Co(III) methanol-specific corrinoid protein]:coenzyme M methyltransferase	Ga0180325_112544	ATW25481.1
		[methyl-Co(III) methanol-specific corrinoid protein]:coenzyme M methyltransferase	Ga0180325_115395	ATW27801.1
		[methyl-Co(III) methanol-specific corrinoid protein]:coenzyme M methyltransferase	Ga0180325_115702	ATW28051.1
	mtmC/mtbC/mttC	5-methyltetrahydrofolate--homocysteine methyltransferase	Ga0180325_11439	ATW23748.1
	mttC	trimethylamine corrinoid protein	Ga0180325_11456	ATW23763.1
	mtbC	Methanogenic corrinoid protein MtbC1	Ga0180325_11500	ATW23802.1
	mtbC	Methanogenic corrinoid protein MtbC1	Ga0180325_11502	ATW23804.1
	mtbC	Methanogenic corrinoid protein MtbC1	Ga0180325_11517	ATW23819.1
	mtbC	Methanogenic corrinoid protein MtbC1	Ga0180325_11521	ATW23822.1
	mtmC/mtbC/mttC	5-methyltetrahydrofolate--homocysteine methyltransferase	Ga0180325_111153	ATW24332.1
	mtmC/mtbC/mttC	methyltransferase cognate corrinoid proteins	Ga0180325_111156	ATW24334.1
	mtmC/mtbC/mttC	5-methyltetrahydrofolate--homocysteine methyltransferase	Ga0180325_111236	ATW28393.1
	mttC	trimethylamine corrinoid protein	Ga0180325_111274	ATW24432.1
	mtmC/mtbC/mttC	5-methyltetrahydrofolate--homocysteine methyltransferase	Ga0180325_111281	ATW28399.1
	mttC	trimethylamine corrinoid protein	Ga0180325_111512	ATW24629.1
	mtmC/mtbC/mttC	5-methyltetrahydrofolate--homocysteine methyltransferase	Ga0180325_111615	ATW24706.1
	mtmC/mtbC/mttC	5-methyltetrahydrofolate--homocysteine methyltransferase	Ga0180325_111616	ATW24707.1
	mtbC	Methanogenic corrinoid protein MtbC1	Ga0180325_111663	ATW24745.1
	mtbC	Methanogenic corrinoid protein MtbC1	Ga0180325_111666	ATW24746.1
	mtmC/mtbC/mttC	5-methyltetrahydrofolate--homocysteine methyltransferase	Ga0180325_111677	ATW28460.1
	mtbC	Methanogenic corrinoid protein MtbC1	Ga0180325_111699	ATW24770.1
	mtbC	Methanogenic corrinoid protein MtbC1	Ga0180325_111701	ATW24772.1
	mttC	trimethylamine corrinoid protein	Ga0180325_111806	ATW24859.1
	mttC	5-methyltetrahydrofolate--homocysteine methyltransferase/trimethylamine corrinoid protein	Ga0180325_111811	ATW24864.1
	mtmC/mtbC/mttC	5-methyltetrahydrofolate--homocysteine methyltransferase	Ga0180325_112018	ATW28506.1
	mtbC	Methanogenic corrinoid protein MtbC1	Ga0180325_112242	ATW28539.1
	mtbC	Methanogenic corrinoid protein MtbC1	Ga0180325_112245	ATW25224.1
	mtmC/mtbC/mttC	methyltransferase cognate corrinoid proteins	Ga0180325_112545	ATW25482.1
	mttC	trimethylamine corrinoid protein	Ga0180325_112546	ATW28568.1
	mtmC/mtbC/mttC	5-methyltetrahydrofolate--homocysteine methyltransferase	Ga0180325_112642	ATW25547.1
	mtmC/mtbC/mttC	5-methyltetrahydrofolate--homocysteine methyltransferase	Ga0180325_112645	DCMF_12975a
	mtmC/mtbC/mttC	5-methyltetrahydrofolate--homocysteine methyltransferase/trimethylamine corrinoid protein	Ga0180325_113010	ATW25846.1
	mttC	trimethylamine corrinoid protein	Ga0180325_113355	DCMF_16330a
	mtmC/mtbC/mttC	5-methyltetrahydrofolate--homocysteine methyltransferase	Ga0180325_113360	ATW26134.1
	mtmC/mtbC/mttC	5-methyltetrahydrofolate--homocysteine methyltransferase	Ga0180325_113423	ATW26185.1
	mtmC/mtbC/mttC	5-methyltetrahydrofolate--homocysteine methyltransferase	Ga0180325_113624	ATW26343.1
	mtmC/mtbC/mttC	5-methyltetrahydrofolate--homocysteine methyltransferase	Ga0180325_113658	ATW26367.1
	mtmC/mtbC/mttC	5-methyltetrahydrofolate--homocysteine methyltransferase	Ga0180325_113813	ATW26490.1
	mtmC/mtbC/mttC	5-methyltetrahydrofolate--homocysteine methyltransferase	Ga0180325_113829	ATW28732.1
	mtmC/mtbC/mttC	methyltransferase cognate corrinoid proteins	Ga0180325_114062	ATW26708.1
	mttC	trimethylamine corrinoid protein	Ga0180325_114323	DCMF_21095a
	mtmC/mtbC/mttC	5-methyltetrahydrofolate--homocysteine methyltransferase	Ga0180325_114450	ATW27029.1
	mtbC	Methanogenic corrinoid protein MtbC1	Ga0180325_114649	ATW27182.1
	mttC	trimethylamine corrinoid protein	Ga0180325_114728	ATW27252.1
	mtmC/mtbC/mttC	5-methyltetrahydrofolate--homocysteine methyltransferase	Ga0180325_114734	ATW27257.1
	mtmC/mtbC/mttC	5-methyltetrahydrofolate--homocysteine methyltransferase	Ga0180325_114736	ATW27258.1
	mtbC	Methanogenic corrinoid protein MtbC1	Ga0180325_114771	ATW27283.1
	mtbC	Methanogenic corrinoid protein MtbC1	Ga0180325_114772	ATW27284.1
	mtbC	dimethylamine corrinoid protein	Ga0180325_115012	ATW28877.1
	mttC	trimethylamine corrinoid protein	Ga0180325_115209	ATW27646.1
	mtmC/mtbC/mttC	5-methyltetrahydrofolate--homocysteine methyltransferase	Ga0180325_115284	ATW27706.1
	mttC	trimethylamine corrinoid protein	Ga0180325_115333	ATW27746.1
	mtmC/mtbC/mttC	5-methyltetrahydrofolate--homocysteine methyltransferase	Ga0180325_115354	ATW28918.1
	mtmC/mtbC/mttC	methyltransferase cognate corrinoid proteins	Ga0180325_115389	ATW27796.1
	mtmC/mtbC/mttC	methyltransferase cognate corrinoid proteins	Ga0180325_115394	ATW27800.1
	mtmC/mtbC/mttC	5-methyltetrahydrofolate--homocysteine methyltransferase	Ga0180325_115420	ATW27822.1
	mtmC/mtbC/mttC	5-methyltetrahydrofolate--homocysteine methyltransferase	Ga0180325_115485	ATW27881.1
	mtmC/mtbC/mttC	5-methyltetrahydrofolate--homocysteine methyltransferase	Ga0180325_115487	ATW27883.1
	mtmC/mtbC/mttC	5-methyltetrahydrofolate--homocysteine methyltransferase	Ga0180325_115517	ATW27905.1
	mtbC	Methanogenic corrinoid protein MtbC1	Ga0180325_115712	ATW28060.1
	mtmC/mtbC/mttC	5-methyltetrahydrofolate--homocysteine methyltransferase	Ga0180325_115771	ATW28111.1
	mttC	trimethylamine corrinoid protein	Ga0180325_115801	ATW28136.1
	mtmC/mtbC/mttC	5-methyltetrahydrofolate--homocysteine methyltransferase	Ga0180325_115806	ATW28140.1
	Quaternary amine transporters
		Choline-glycine betaine transporter	Ga0180325_1144	ATW23425.1
		betaine/carnitine transporter, BCCT family	Ga0180325_113353	ATW26129.1
		Choline-glycine betaine transporter	Ga0180325_113765	ATW26449.1
		glycine betaine transporter	Ga0180325_114068	ATW26715.1
		Choline-glycine betaine transporter	Ga0180325_114147	ATW28763.1
		betaine/carnitine transporter, BCCT family	Ga0180325_114731	ATW28763.1
		glycine betaine transporter	Ga0180325_114741	ATW28838.1
		glycine betaine transporter	Ga0180325_114742	ATW27262.1
		betaine/carnitine transporter, BCCT family	Ga0180325_114887	ATW27379.1
		betaine/carnitine transporter, BCCT family	Ga0180325_114964	ATW27445.1
		glycine betaine transporter	Ga0180325_115498	ATW27891.1
		glycine betaine transporter	Ga0180325_115520	ATW27908.1
		Choline-glycine betaine transporter	Ga0180325_115639	ATW28002.1
		betaine/carnitine transporter, BCCT family	Ga0180325_115820	ATW28154.1
	ATP synthase
	atpC	ATP synthase F1 subcomplex epsilon subunit	Ga0180325_113152	ATW25976.1
	atpD	ATP synthase F1 subcomplex beta subunit	Ga0180325_113153	DCMF_15390
	atpG	ATP synthase F1 subcomplex gamma subunit	Ga0180325_113154	ATW25977.1
	atpA	ATP synthase F1 subcomplex alpha subunit	Ga0180325_113155	ATW25978.1
	atpH	ATP synthase F1 subcomplex delta subunit	Ga0180325_113156	ATW25979.1
	atpF	ATP synthase F0 subcomplex B subunit	Ga0180325_113157	ATW28634.1
	atpE	ATP synthase F0 subcomplex C subunit	Ga0180325_113158	ATW25980.1
	atpB	ATP synthase F0 subcomplex A subunit	Ga0180325_113159	ATW25981.1
		ATP synthase I chain	Ga0180325_113160	ATW25982.1
	Rnf complex
	rnfC	Na+-translocating ferredoxin:NAD+ oxidoreductase RNF, RnfC subunit	Ga0180325_112356	ATW25316.1
	rnfB	electron transport complex, RnfABCDGE type, B subunit	Ga0180325_113065	ATW25898.1
	rnfA	electron transport complex protein RnfA	Ga0180325_113066	ATW25899.1
	rnfE	electron transport complex protein RnfE	Ga0180325_113067	ATW25900.1
	rnfG	electron transport complex protein RnfG	Ga0180325_113068	ATW25901.1
	rnfD	electron transport complex protein RnfD	Ga0180325_113069	ATW25902.1
	rnfC	electron transport complex protein RnfC	Ga0180325_113070	ATW25903.1
	rnfC	Na+-translocating ferredoxin:NAD+ oxidoreductase RNF, RnfC subunit	Ga0180325_115616	ATW27983.1
	aProtein is marked as a pseudogene by NCBI and thus has no GenBank accession number. NCBI gene locus is given instead.

## Sheet: Table S7
	Table S7. Genes for selenocysteine biosynthesis and incorporation into proteins in DCMF.
	Gene	Protein Product	JGI Gene Locus	GenBank Accession
	serS	serine-tRNA ligase	Ga0180325_113714	ATW26414.1
	selA	L-seryl-tRNA(Sec) selenium transferase	Ga0180325_113685	ATW28718.1
	selB	selenocysteine-specific translation elongation factor	Ga0180325_113684	ATW26386.1
	selC	tRNA(Sec)	Ga0180325_Sec
	selD	selenide, water dikinase	Ga0180325_113493	ATW28688.1

## Sheet: Table S8
	Table S8. Genes for pyrrolysine biosynthesis and incorporation into proteins in DCMF.
	Gene	Protein Product	JGI Gene Locus	GenBank Accession
	pylC	hypothetical protein	Ga0180325_111617	ATW24708.1
	pylB	methylornithine synthase	Ga0180325_111618	ATW24709.1
	pylT	tRNA-Pyl(cta)	Ga0180325_Pyl1
	pylC	hypothetical protein	Ga0180325_112911	No equivalent
	pylB	iron-only hydrogenase maturation protein HydG	Ga0180325_112912	ATW25764.1
	pylD	pyrrolysine biosynthesis protein PylD	Ga0180325_114723	ATW27247.1
	pylT	tRNA-Pyl(cta)	Ga0180325_Pyl2
	pylT	tRNA-Pyl(cta)	Ga0180325_Pyl3
	pylSc	Pyrrolysyl-tRNA synthetase	Ga0180325_115767	ATW28107.1
	pylB	methylornithine synthase	Ga0180325_115768	ATW28108.1
	pylC	pyrrolysine biosynthesis protein PylC	Ga0180325_115769	ATW28109.1
	pylSn	pyrrolysyl-tRNA synthetase, N-terminal region	Ga0180325_115770	ATW28110.1

## Sheet: Table S9
	Table S9. Corrinoid biosynthetic pathway genes in DCMF.
	Functional Group	Gene	Protein Product	JGI Gene Locus	GenBank Accession
	Corrin ring methylation and contraction	cysG(sirA)	Siroheme synthase/Urophorphyrin III C-methyltransferase	Ga0180325_115764	ATW28105.1
		cbiC	Precorrin-8X methylmutase	Ga0180325_115788	ATW28124.1
		cbiD	Cobalt-precorrin-6-methyltransferase	Ga0180325_115789	ATW28125.1
		cbiE	Precorrin-6y C5, 15-methyltransferase	Ga0180325_11827	ATW28340.1
		cbiE	Precorrin-6y C5, 15-methyltransferase	Ga0180325_115790	ATW28126.1
		cbiF	Cobalt-precorrin-4 C11-methyltransferase	Ga0180325_115793	ATW28129.1
		cbiG	Cobalamin biosynthesis protein	Ga0180325_115794	ATW28978.1
		cbiH	Cobalt-precorrin-3b C17-methyltransferase	Ga0180325_115795	ATW28130.1
		cbiL	Cobalt-precorrin-2 C20-methyltransferase	Ga0180325_115792	ATW28128.1
		cbiT	Cobalt-precorrin-6y C15-methyltransferase [decarboxylating]	Ga0180325_115791	ATW28127.1
	Corrin ring amination	cbiA	Cobyrinic acid a,c-diamide synthase	Ga0180325_115787	ATW28123.1
		cbiP	Cobyric acid synthase	Ga0180325_115784	ATW28121.1
	Initiation and completion of lower nucleotide loop	cbiB	Cobalamin biosynthesis protein	Ga0180325_115785	ATW28122.1
		cobC	Alpha-ribazole-5'-phosphate phosphatase	Ga0180325_115783	ATW28120.1
		cobD	L-threonine 3-O-phosphate decarboxylase	Ga0180325_115786	ATW28977.1
		cobS	Cobalamin synthase	Ga0180325_111039	ATW24237.1
		cobT	Nicotinate-nucleotide-dimethylbenzimidazole phosphoribosyltransferase	Ga0180325_115781	ATW28118.1
		cobU	Bifunctional adenosylcobinamide kinase/adenosylcobinamide phosphate guanylytransferase	Ga0180325_115782	ATW28119.1
	Cobalt active transport	cbiM	Substrate-specific cobalt transporter	Ga0180325_115129	ATW28890.1
		cbiO	Cobalt ABC transporter, ATPase subunit	Ga0180325_115148	ATW27592.1
		cbiQ	Cobalt ABC transporter, transmembrane subunit	Ga0180325_113196	ATW27634.1
		cbiQ	Cobalt ABC transporter, transmembrane subunit	Ga0180325_115090	ATW28884.1
		cbiQ	Cobalt ABC transporter, transmembrane subunit	Ga0180325_115765	ATW28106.1
	Cobalt insertion	cbiX	Sirohydrochlorin cobaltochelatase	Ga0180325_115761	ATW28102.1

## Sheet: Table S10
	Table S10. Raw data for Figure 1.
	Figure 1A.	DCM over time (mM)			Cumulative DCM Consumed (mM)			Methane over time (mM)				Figure 1B.	DCM over time (mM)
	Day	A	B	C	A	B	C	A	B	C		Time (d)	-BES	+BES1	+BES2
	0	0.284607	0.248977	0.246424	0	0	0	0.00111007	0.000720549	0.00102667		0	0.299874	0.317255	0.312305
	7	0.199424	0.200941	0.193339	0.0851829	0.048036	0.053085	0.112931	0.122373	0.00176596		7	0.23365	0.256908	0.259378
	14	0.13383	0.211094	0.198474	0.150777	0.048036	0.053085	0.184536	0.149831	0.0620577		14	0.314585	0.334416	0.33212
	21	0	0.190141	0.201191	0.284607	0.058836	0.053085	0.309127	0.143732	0.0725243		42	0.042541	0.224544	0.16064
	21	0.24382										42	0.507348	0.61145	0.535244
	28	0.157674	0.134221	0.194566	0.370753	0.114756	0.053085	0.340148	0.184825	0.0804075		50	0.342984	0.51619	0.453454
	35	0.00864547	0	0.0818824	0.519782	0.248977	0.164542	0.371639	0.289948	0.14908		57	0	0.402473	0.364246
	35	0.231034	0.212914									67	0.003146	0.253581	0.276206
	42	0	0.197337	0	0.750816	0.264554	0.246424	0.488411	0.383703	0.252679		67	0.345394	0.334378	0.506198
	42	0.433333		0.418157								81			0.351467
	49	0.201154	0.000194	0.310056	0.982995	0.461697	0.354525	0.529318	0.49237	0.262339		102			0
	49		0.308659									102	0.268179	0.262939	0.495623
	56	0	0.03377	0.27011	1.18415	0.736586	0.394471	0.661916	0.680416	0.294876		124	0	0	0.014288
	56	0.314036	0.381176									124	0.632019	0.666069	0.53907
	63	0.016637	0	0.051169	1.48155	1.11776	0.613412	0.81271	0.919255	0.436315		133	0.532505	0.564713	0.054389
	63	0.378282	0.326164	0.399669								133			0.74909
	70	0	0	0.263152	1.85983	1.44393	0.749929	0.716968	0.778509	0.365875		144	0.515119	0.594638	0.0753
	70	0.320684	0.384519	0.464593
	77	0.0284905	0	0.16989	2.15202	1.82844	1.04463	0.827265	0.919571	0.478838
	77	0.126216	0.125132
	84	0.0011175	0.0561625	0.0010755	2.27712	1.89741	1.21345	0.966997	1.02218	0.543876
	84	0.216269	0.207157	0.173606
	91	0	0	0	2.49339	2.10457	1.38705	1.05888	1.07647	0.655458
	91	0.429444	0.468005	0.378655
	97	0.352529	0.229724	0.410293	2.57031	2.34285	1.38705	1.28829	1.39358	0.785791
	97	0.782	0.668908	0.673785
	104	0.435999	0.047149	0.519689	2.91631	2.96461	1.54115	1.44168	1.66769	0.928932
	104	0.860265	0.742933	0.972638
	111	0	0	0.169743	3.77657	3.70754	2.34404	1.82742	2.01853	1.41297
	111	0.706923	0.730865	0.730075
	118	0	0.164008	0	4.48349	4.2744	3.07412	2.33922	2.31991	1.71901
	118	0.696582	0.877843	0.768216
	125	0.142823	0	0.66733	5.03725	5.15224	3.17501	2.59052	2.77298	2.13468
	125	0.680841	0.712223	0.813026
	132	0	0	0	5.71809	5.86447	3.98803	3.11249	2.96959	2.86536
	132	0.90152	0.912142	1.04418
	139	0.149189	0.0230452	0.322673	6.47043	6.75356	4.70954	3.92337	3.71902	3.30665

[truncated: 4 more sheets: Figure S1, Figure S2, Figure S3, Figure S4]
